# Supplementary material
Source: Research Square preprint supplement (doi:10.21203/rs.3.rs-9446527/v1)

**Adaptive Passive Shading System – Complete Technical Documentation**

This document contains the full research process from mechanism design to performance simulation, including all MATLAB codes, numerical procedures, and results. It is organized into three main parts:

1. **Mechanism.docx** – Theoretical modeling, kinematic constraints, optimization, sensitivity analysis, and final optimal design.
2. **Optimal vicinity.docx** – Verification of parasitic degrees of freedom, gravity moment, contact mode comparison, and surrogate model construction.
3. **Shading rate.docx** – Annual performance simulation (shading rate, comfort hours, energy comparison) for two latitudes, including final fine‑tuning of parameter *b*.

All codes are presented as they were executed, with outputs included.

**Part 1: Mechanism.docx**

**Adaptive Passive Shading System – Complete Technical Description (Based on Northern Bottom Edge Sliding and Rotation)**

**1. Coordinate System and Notation**

- **Origin O**: Same height as the bottom ends of panels 1 and 5 on the wall.
- **X axis**: Positive southward (perpendicular to the wall, pointing outward).
- **Y axis**: Positive eastward (along the wall horizontally).
- **Z axis**: Positive upward (vertical).
- **Wall**: Plane .

**2. Components and Initial Geometric Parameters**

**2.1 Fixed Points**

- Bottom end of panel 1: , with  (later changed to 1.5 m in final simulations).
- Bottom end of panel 5: .

**2.2 Panels 1 and 5 (Driving Panels)**

- Azimuth:  (south‑west),  (south‑east).
- Inclination  (angle with horizontal), to be determined.
- Common length  (panels 1 and 5 equal), to be determined.
- Direction vector (right‑hand system):

Therefore:

- Initial top ends:

**2.3 Panel 3 (Shading Panel)**

- Rectangular shape, initially horizontal.
- Key points:
  - Point 1 (left hinge, connection between panel 2 and panel 3):
  - Point 2 (right hinge, connection between panel 3 and panel 4):
  - Where  is the X‑coordinate of point 1 (northward extension),  is the half‑width of the shading panel,  is the Z‑coordinate of points 1 and 2.
- Vertical extension: from  to , with .
- **Northern bottom edge**: a horizontal line segment from  to . Its midpoint is denoted .

**2.4 Hinge Types**

- Panel 1–Panel 2: East‑west hinge (rotation axis parallel to Y‑axis) ⇒ Y‑coordinate of point 1 must equal Y‑coordinate of .
- Panel 2–Panel 3: Universal joint.
- Panel 3–Panel 4: East‑west hinge ⇒ Y‑coordinate of point 2 must equal Y‑coordinate of .
- Panel 4–Panel 5: Universal joint.
- Bottom ends of panels 5 and 1 are fixed.

**3. Initial Geometric Consistency Conditions**

From the east‑west hinge constraints:

Similarly,  is automatically satisfied.

Thus, given  and ,  is uniquely determined by equation (1). The coordinates of points 1 and 2 also require suitable choices of  and  such that the direction of panel 2 satisfies:

- Panel 2 should point in the negative X, positive Y, and positive Z directions, i.e., the vector  must have components:

This requires:

 is already given by (1) and automatically ensures  (because  is negative).

Lengths of panel 2 and panel 4:

By symmetry, .

**4. Deformation Kinematics**

**4.1 Actuation**

- Panel 1 expands by  (later 0.2 m), panel 5 length remains unchanged.
- New top of panel 1: .
- New top of panel 5: .

**4.2 Assumed Motion of Shading Panel**

The shading panel always contacts the wall along its northern bottom edge. This edge can translate and rotate on the wall (sliding in Y and Z, and rotating about its own midpoint). Additionally, the panel can rotate about this edge. Let:

- New midpoint of contact line: .
- Rotation angle about the edge:  (about Y‑axis, right‑hand system, positive direction makes point 1 move southward and downward).
- Additional rotation about X‑axis:  (introduced later to account for twist).

**4.3 Length Constraint Conditions**

Panels 2 and 4 maintain their original length  (non‑expanding in Case A):

These are two equations with three unknowns ; generally there are infinitely many solutions. We use least‑squares minimization.

**5. Numerical Solution Procedure**

1. Input or set  and , compute .
2. Choose  and  satisfying the direction conditions (e.g., , ).
3. Compute .
4. After expansion of panel 1, obtain .
5. Solve:

using lsqnonlin with initial guess  and appropriate bounds.

1. Output new contact line midpoint, rotation angle, new coordinates of points 1/2, and error.
2. Plot initial and deformed 3D views.

**6. MATLAB Complete Code**

matlab

*%% ==================== Adaptive Shading System Comprehensive Optimization (Revised Rotation Direction + Specified Scan Range + y0 ∈ [2,4]) ====================*

clear; clc; close all;

*%% ==================== Fixed Parameters ====================*

dy = 1.5; *% Absolute Y-coordinate of bottom ends of panels 1 and 5 on wall (m)*

deltaL = 0.2; *% Expansion length (m)*

a = 0.4; *% Southward extension of shading panel (m)*

c = 0.05; *% Upward extension (m)*

d = 0.05; *% Downward extension (m)*

*%% ==================== Stage 1: Coarse Scan (over given ranges) ====================*

fprintf('========== Coarse Scan Start ==========\n');

*% Parameter scan ranges*

beta_range = 10:2:80; *% inclination angle (deg)*

l_range = 2:0.2:5; *% length of panels 1 and 5 (m)*

b_range = 0.6:0.4:3; *% X-coordinate of point 1 (m)*

z0_range = 3:0.2:7; *% Z-coordinate of point 1 (m)*

psi1_range = 30:2:80; *% azimuth angle of panel 1 (deg)*

*% Store all valid combinations*

results = [];

cnt = 0;

for beta = beta_range

cosb = cosd(beta); sinb = sind(beta);

for l = l_range

for psi1 = psi1_range

psi5 = -psi1; *% symmetric*

u1 = [cosb*cosd(psi1), -cosb*sind(psi1), sinb];

u5 = [cosb*cosd(psi5), -cosb*sind(psi5), sinb];

A1 = [0, -dy, 0]; A5 = [0, dy, 0];

B1 = A1 + l * u1;

B5 = A5 + l * u5;

B1_X = B1(1); B1_Z = B1(3);

*% Determine y0 from hinge constraint*

y0 = dy + l * cosb * sind(psi1); *% because B1(2) = -dy - l*cosb*sind(psi1)*

*% Enforce y0 range [2,4]*

if y0 < 2 || y0 > 4

continue;

end

for b = b_range

if b >= B1_X, continue; end *% ensure panel 2 X-direction negative*

for z0 = z0_range

if z0 <= B1_Z, continue; end *% ensure panel 2 Z-direction positive*

*% Initial hinge points*

P1_init = [b, -y0, z0];

P2_init = [b, y0, z0];

*% Initial lengths of panels 2 and 4*

L2 = norm(B1 - P1_init);

L4 = norm(B5 - P2_init);

if abs(L2 - L4) > 1e-6, continue; end *% symmetry must hold*

*% ---------- Case A: Panel 1 expands, panel 5 unchanged ----------*

B1_new_A = A1 + (l + deltaL) * u1;

B5_new_A = B5;

*% Solve for new position of shading panel (unknowns: y_c, z_c, theta, alpha)*

funA = @(x) motion_errors(x, b, d, y0, z0, B1_new_A, B5_new_A, L2, L4, 'A');

x0 = [0; z0-d; 0; 0];

lb = [-1; z0-d-1; 0; -0.5];

ub = [ 1; z0-d+1; 0.5; 0.5];

options = optimoptions('lsqnonlin', 'Display', 'off', 'TolFun', 1e-8, 'MaxIterations', 200);

try

x_opt_A = lsqnonlin(funA, x0, lb, ub, options);

[P1_new_A, P2_new_A] = compute_points(b, d, y0, x_opt_A(1), x_opt_A(2), x_opt_A(3), x_opt_A(4));

drop_A = z0 - P1_new_A(3); *% positive if point 1 descends*

if drop_A <= 0, continue; end

*% Compute tilt angle γ*

z_diff_A = abs(P1_new_A(3) - P2_new_A(3));

y_dist_A = abs(P1_new_A(2) - P2_new_A(2));

gamma_A = atan2d(z_diff_A, y_dist_A); *% deg*

catch

continue;

end

*% ---------- Case B: Panels 2 and 4 expand, panels 1 and 5 unchanged ----------*

B1_new_B = B1;

B5_new_B = B5;

funB = @(x) motion_errors(x, b, d, y0, z0, B1_new_B, B5_new_B, L2, L4, 'B');

try

x_opt_B = lsqnonlin(funB, x0, lb, ub, options);

[P1_new_B, P2_new_B] = compute_points(b, d, y0, x_opt_B(1), x_opt_B(2), x_opt_B(3), x_opt_B(4));

rise_B = ((P1_new_B(3) + P2_new_B(3))/2 - z0); *% positive rise*

if rise_B <= 0, continue; end

ratio_B = rise_B / deltaL; *% amplification ratio*

catch

continue;

end

*% Record valid combination*

cnt = cnt + 1;

results(cnt).beta = beta;

results(cnt).l = l;

results(cnt).psi1 = psi1;

results(cnt).b = b;

results(cnt).z0 = z0;

results(cnt).y0 = y0;

results(cnt).gamma = gamma_A;

results(cnt).ratio_B = ratio_B;

results(cnt).drop_A = drop_A;

results(cnt).rise_B = rise_B;

results(cnt).P1_init = P1_init;

results(cnt).P2_init = P2_init;

results(cnt).P1_new_A = P1_new_A;

results(cnt).P2_new_A = P2_new_A;

results(cnt).P1_new_B = P1_new_B;

results(cnt).P2_new_B = P2_new_B;

fprintf('Coarse: β=%.1f°, l=%.2f, ψ1=%.1f°, b=%.2f, z0=%.2f, y0=%.2f, γ=%.2f°, ampl. ratio=%.2f, drop=%.3f\n',...

beta, l, psi1, b, z0, y0, gamma_A, ratio_B, drop_A);

end

end

end

end

end

if isempty(results)

error('No valid parameter combination found. Expand scan range or check constraints.');

end

*% Extract arrays*

gamma_vals = [results.gamma];

ratio_vals = [results.ratio_B];

*% Normalization*

gamma_max = max(gamma_vals);

ratio_max = max(ratio_vals);

*% Composite score (weights: γ 40%, amplification ratio 60%)*

scores = 0.4 * (gamma_vals / gamma_max) + 0.6 * (ratio_vals / ratio_max);

[best_score, idx_best] = max(scores);

best = results(idx_best);

fprintf('\n========== Coarse Scan Optimal Result ==========\n');

disp(best);

fprintf('Composite score = %.4f\n', best_score);

*%% ==================== Stage 2: Single‑Parameter Sensitivity Analysis (around coarse optimum) ====================*

fprintf('\n========== Stage 2: Single‑Parameter Sensitivity Analysis ==========\n');

*% Baseline parameters*

beta0 = best.beta;

l0 = best.l;

psi10 = best.psi1;

b0 = best.b;

z00 = best.z0;

y00 = best.y0;

*% Parameters to analyze and their variation ranges*

params = {'beta', 'l', 'psi1', 'b', 'z0'};

ranges = {linspace(max(10, beta0-20), min(80, beta0+20), 15), ...

linspace(max(2, l0-1), min(5, l0+1), 15), ...

linspace(max(30, psi10-20), min(80, psi10+20), 15), ...

linspace(max(0.6, b0-0.5), min(3, b0+0.5), 15), ...

linspace(max(z00-1, 3), min(7, z00+1), 15)};

*% Store sensitivity data*

sens_data = struct();

for p = 1:length(params)

param_name = params{p};

param_vals = ranges{p};

gamma_sens = zeros(size(param_vals));

ratio_sens = zeros(size(param_vals));

for i = 1:length(param_vals)

*% Set current parameter, others fixed at baseline*

switch param_name

case 'beta'

beta_cur = param_vals(i); l_cur = l0; psi1_cur = psi10; b_cur = b0; z0_cur = z00;

case 'l'

beta_cur = beta0; l_cur = param_vals(i); psi1_cur = psi10; b_cur = b0; z0_cur = z00;

case 'psi1'

beta_cur = beta0; l_cur = l0; psi1_cur = param_vals(i); b_cur = b0; z0_cur = z00;

case 'b'

beta_cur = beta0; l_cur = l0; psi1_cur = psi10; b_cur = param_vals(i); z0_cur = z00;

case 'z0'

beta_cur = beta0; l_cur = l0; psi1_cur = psi10; b_cur = b0; z0_cur = param_vals(i);

end

*% Compute current y0 and B1, check feasibility*

cosb = cosd(beta_cur); sinb = sind(beta_cur);

psi5_cur = -psi1_cur;

u1 = [cosb*cosd(psi1_cur), -cosb*sind(psi1_cur), sinb];

u5 = [cosb*cosd(psi5_cur), -cosb*sind(psi5_cur), sinb];

A1 = [0, -dy, 0]; A5 = [0, dy, 0];

B1_cur = A1 + l_cur * u1;

B5_cur = A5 + l_cur * u5;

B1_X = B1_cur(1); B1_Z = B1_cur(3);

y0_cur = dy + l_cur * cosb * sind(psi1_cur);

if y0_cur < 2 || y0_cur > 4 || b_cur >= B1_X || z0_cur <= B1_Z

gamma_sens(i) = NaN; ratio_sens(i) = NaN; continue;

end

*% Initial lengths*

P1_init = [b_cur, -y0_cur, z0_cur];

P2_init = [b_cur, y0_cur, z0_cur];

L2 = norm(B1_cur - P1_init);

L4 = norm(B5_cur - P2_init);

if abs(L2 - L4) > 1e-4

gamma_sens(i) = NaN; ratio_sens(i) = NaN; continue;

end

*% Case A*

B1_new_A = A1 + (l_cur + deltaL) * u1;

funA = @(x) motion_errors(x, b_cur, d, y0_cur, z0_cur, B1_new_A, B5_cur, L2, L4, 'A');

x0 = [0; z0_cur-d; 0; 0];

lb = [-1; z0_cur-d-1; 0; -0.5];

ub = [ 1; z0_cur-d+1; 0.5; 0.5];

options = optimoptions('lsqnonlin', 'Display', 'off');

try

x_opt_A = lsqnonlin(funA, x0, lb, ub, options);

[P1_new_A, ~] = compute_points(b_cur, d, y0_cur, x_opt_A(1), x_opt_A(2), x_opt_A(3), x_opt_A(4));

drop_A = z0_cur - P1_new_A(3);

if drop_A <= 0

gamma_sens(i) = NaN;

else

[P1_new_A, P2_new_A] = compute_points(b_cur, d, y0_cur, x_opt_A(1), x_opt_A(2), x_opt_A(3), x_opt_A(4));

z_diff = abs(P1_new_A(3) - P2_new_A(3));

y_dist = abs(P1_new_A(2) - P2_new_A(2));

gamma_sens(i) = atan2d(z_diff, y_dist);

end

catch

gamma_sens(i) = NaN;

end

*% Case B*

funB = @(x) motion_errors(x, b_cur, d, y0_cur, z0_cur, B1_cur, B5_cur, L2, L4, 'B');

try

x_opt_B = lsqnonlin(funB, x0, lb, ub, options);

[P1_new_B, P2_new_B] = compute_points(b_cur, d, y0_cur, x_opt_B(1), x_opt_B(2), x_opt_B(3), x_opt_B(4));

rise = ((P1_new_B(3) + P2_new_B(3))/2 - z0_cur);

if rise <= 0

ratio_sens(i) = NaN;

else

ratio_sens(i) = rise / deltaL;

end

catch

ratio_sens(i) = NaN;

end

end

sens_data(p).name = param_name;

sens_data(p).vals = param_vals;

sens_data(p).gamma = gamma_sens;

sens_data(p).ratio = ratio_sens;

*% Plot*

figure;

yyaxis left;

plot(param_vals, gamma_sens, 'b-o', 'LineWidth', 1.5);

ylabel('γ (deg)');

yyaxis right;

plot(param_vals, ratio_sens, 'r-s', 'LineWidth', 1.5);

ylabel('Amplification ratio');

xlabel(param_name);

title(sprintf('Sensitivity Analysis: %s', param_name));

grid on;

legend('γ', 'Amplification ratio', 'Location', 'best');

end

*%% ==================== Stage 3: Fine Scan around Coarse Optimum ====================*

fprintf('\n========== Stage 3: Fine Scan Start ==========\n');

*% Fine scan ranges (around coarse optimum, smaller steps)*

beta_fine = max(10, beta0-5):1:min(80, beta0+5);

l_fine = max(2, l0-0.5):0.1:min(5, l0+0.5);

psi1_fine = max(30, psi10-5):2:min(80, psi10+5);

b_fine = max(0.6, b0-0.3):0.1:min(3, b0+0.3);

z0_fine = max(3, z00-0.5):0.1:min(7, z00+0.5);

fine_results = [];

cnt_fine = 0;

for beta = beta_fine

cosb = cosd(beta); sinb = sind(beta);

for l = l_fine

for psi1 = psi1_fine

psi5 = -psi1;

u1 = [cosb*cosd(psi1), -cosb*sind(psi1), sinb];

u5 = [cosb*cosd(psi5), -cosb*sind(psi5), sinb];

A1 = [0, -dy, 0]; A5 = [0, dy, 0];

B1 = A1 + l * u1;

B5 = A5 + l * u5;

B1_X = B1(1); B1_Z = B1(3);

y0 = dy + l * cosb * sind(psi1);

if y0 < 2 || y0 > 4, continue; end

for b = b_fine

if b >= B1_X, continue; end

for z0 = z0_fine

if z0 <= B1_Z, continue; end

P1_init = [b, -y0, z0];

P2_init = [b, y0, z0];

L2 = norm(B1 - P1_init);

L4 = norm(B5 - P2_init);

if abs(L2 - L4) > 1e-4, continue; end

*% Case A*

B1_new_A = A1 + (l + deltaL) * u1;

funA = @(x) motion_errors(x, b, d, y0, z0, B1_new_A, B5, L2, L4, 'A');

x0 = [0; z0-d; 0; 0];

lb = [-1; z0-d-1; 0; -0.5];

ub = [ 1; z0-d+1; 0.5; 0.5];

options = optimoptions('lsqnonlin', 'Display', 'off', 'TolFun', 1e-8);

try

x_opt_A = lsqnonlin(funA, x0, lb, ub, options);

[P1_new_A, P2_new_A] = compute_points(b, d, y0, x_opt_A(1), x_opt_A(2), x_opt_A(3), x_opt_A(4));

drop_A = z0 - P1_new_A(3);

if drop_A <= 0, continue; end

z_diff = abs(P1_new_A(3) - P2_new_A(3));

y_dist = abs(P1_new_A(2) - P2_new_A(2));

gamma_A = atan2d(z_diff, y_dist);

catch

continue;

end

*% Case B*

funB = @(x) motion_errors(x, b, d, y0, z0, B1, B5, L2, L4, 'B');

try

x_opt_B = lsqnonlin(funB, x0, lb, ub, options);

[P1_new_B, P2_new_B] = compute_points(b, d, y0, x_opt_B(1), x_opt_B(2), x_opt_B(3), x_opt_B(4));

rise_B = ((P1_new_B(3) + P2_new_B(3))/2 - z0);

if rise_B <= 0, continue; end

ratio_B = rise_B / deltaL;

catch

continue;

end

*% Record*

cnt_fine = cnt_fine + 1;

fine_results(cnt_fine).beta = beta;

fine_results(cnt_fine).l = l;

fine_results(cnt_fine).psi1 = psi1;

fine_results(cnt_fine).b = b;

fine_results(cnt_fine).z0 = z0;

fine_results(cnt_fine).y0 = y0;

fine_results(cnt_fine).gamma = gamma_A;

fine_results(cnt_fine).ratio_B = ratio_B;

fine_results(cnt_fine).drop_A = drop_A;

fine_results(cnt_fine).rise_B = rise_B;

fine_results(cnt_fine).P1_init = P1_init;

fine_results(cnt_fine).P2_init = P2_init;

fine_results(cnt_fine).P1_new_A = P1_new_A;

fine_results(cnt_fine).P2_new_A = P2_new_A;

fine_results(cnt_fine).P1_new_B = P1_new_B;

fine_results(cnt_fine).P2_new_B = P2_new_B;

end

end

end

end

end

if isempty(fine_results)

error('Fine scan found no feasible solutions. Expand ranges.');

end

*% Extract fine scan results*

fine_gamma = [fine_results.gamma];

fine_ratio = [fine_results.ratio_B];

fine_gamma_max = max(fine_gamma);

fine_ratio_max = max(fine_ratio);

fine_scores = 0.4*(fine_gamma/fine_gamma_max) + 0.6*(fine_ratio/fine_ratio_max);

[best_fine_score, idx_fine] = max(fine_scores);

best_fine = fine_results(idx_fine);

fprintf('\n========== Fine Scan Optimal Result ==========\n');

disp(best_fine);

fprintf('Composite score = %.4f\n', best_fine_score);

*%% ==================== Stage 4: 3D Plot (Final Optimal Solution) ====================*

fprintf('\n========== Plotting 3D Views ==========\n');

*% Extract final optimal parameters*

beta_opt = best_fine.beta;

l_opt = best_fine.l;

psi1_opt = best_fine.psi1;

b_opt = best_fine.b;

z0_opt = best_fine.z0;

y0_opt = best_fine.y0;

P1_init = best_fine.P1_init;

P2_init = best_fine.P2_init;

P1_new_A = best_fine.P1_new_A;

P2_new_A = best_fine.P2_new_A;

P1_new_B = best_fine.P1_new_B;

P2_new_B = best_fine.P2_new_B;

*% Recompute necessary points*

cosb = cosd(beta_opt); sinb = sind(beta_opt);

psi5_opt = -psi1_opt;

u1 = [cosb*cosd(psi1_opt), -cosb*sind(psi1_opt), sinb];

u5 = [cosb*cosd(psi5_opt), -cosb*sind(psi5_opt), sinb];

A1 = [0, -dy, 0]; A5 = [0, dy, 0];

B1 = A1 + l_opt * u1;

B5 = A5 + l_opt * u5;

B1_new_A = A1 + (l_opt + deltaL) * u1; *% Case A new top of panel 1*

B1_new_B = B1; *% Case B panel 1 unchanged*

B5_new_B = B5;

*% Local coordinates of shading panel corners (relative to midpoint of northern bottom edge C0 = [0,0,z0-d])*

C0 = [0, 0, z0_opt - d];

corners_local = [

0, -y0_opt, 0;

0, y0_opt, 0;

0, -y0_opt, c+d;

0, y0_opt, c+d;

b_opt + a, -y0_opt, 0;

b_opt + a, y0_opt, 0;

b_opt + a, -y0_opt, c+d;

b_opt + a, y0_opt, c+d;

];

*% Initial global corners*

corners_init = C0 + corners_local;

*% Get motion parameters for Case A (re‑solve to ensure consistency)*

L2_opt = norm(B1 - P1_init);

funA_plot = @(x) motion_errors(x, b_opt, d, y0_opt, z0_opt, B1_new_A, B5, L2_opt, L2_opt, 'A');

x0 = [0; z0_opt-d; 0; 0];

lb = [-1; z0_opt-d-1; 0; -0.5];

ub = [ 1; z0_opt-d+1; 0.5; 0.5];

options = optimoptions('lsqnonlin', 'Display', 'off');

x_opt_A_plot = lsqnonlin(funA_plot, x0, lb, ub, options);

*% Case B motion parameters*

funB_plot = @(x) motion_errors(x, b_opt, d, y0_opt, z0_opt, B1, B5, L2_opt, L2_opt, 'B');

x_opt_B_plot = lsqnonlin(funB_plot, x0, lb, ub, options);

*% Transform all corners for both cases*

corners_A = zeros(8,3);

corners_B = zeros(8,3);

for i = 1:8

corners_A(i,:) = transform_point(corners_local(i,:), x_opt_A_plot(1), x_opt_A_plot(2), x_opt_A_plot(3), x_opt_A_plot(4));

corners_B(i,:) = transform_point(corners_local(i,:), x_opt_B_plot(1), x_opt_B_plot(2), x_opt_B_plot(3), x_opt_B_plot(4));

end

*% Plotting*

figure('Position', [50, 50, 1800, 600]);

*% Subplot 1: Initial state*

subplot(1,3,1); hold on; grid on; axis equal;

xlabel('X (south)'); ylabel('Y (east)'); zlabel('Z (up)');

title('Initial State');

view(45,30);

faces = [1 2 4 3; 1 3 7 5; 1 5 6 2; 2 6 8 4; 3 4 8 7; 5 7 8 6];

patch('Vertices', corners_init, 'Faces', faces, 'FaceColor','cyan','FaceAlpha',0.3,'EdgeColor','k');

plot3([A1(1),B1(1)],[A1(2),B1(2)],[A1(3),B1(3)],'b-','LineWidth',3);

plot3([A5(1),B5(1)],[A5(2),B5(2)],[A5(3),B5(3)],'r-','LineWidth',3);

plot3([B1(1),P1_init(1)],[B1(2),P1_init(2)],[B1(3),P1_init(3)],'g-','LineWidth',2);

plot3([B5(1),P2_init(1)],[B5(2),P2_init(2)],[B5(3),P2_init(3)],'m-','LineWidth',2);

plot3(A1(1),A1(2),A1(3),'bo','MarkerFaceColor','b','MarkerSize',8);

plot3(A5(1),A5(2),A5(3),'ro','MarkerFaceColor','r','MarkerSize',8);

plot3(B1(1),B1(2),B1(3),'b^','MarkerSize',8);

plot3(B5(1),B5(2),B5(3),'r^','MarkerSize',8);

plot3(P1_init(1),P1_init(2),P1_init(3),'ks','MarkerFaceColor','k','MarkerSize',8);

plot3(P2_init(1),P2_init(2),P2_init(3),'ks','MarkerFaceColor','k','MarkerSize',8);

plot3(C0(1),C0(2),C0(3),'ro','MarkerFaceColor','r','MarkerSize',8);

*% Wall representation*

[Y_surf, Z_surf] = meshgrid(linspace(-3,3,2), linspace(min(corners_init(:,3))-1, max(corners_init(:,3))+1,2));

surf(zeros(size(Y_surf)), Y_surf, Z_surf, 'FaceAlpha',0.1,'EdgeColor','none','FaceColor',[0.8 0.8 0.8]);

legend('Panel 3','Panel 1','Panel 5','Panel 2','Panel 4','Location','best');

*% Subplot 2: Case A deformed*

subplot(1,3,2); hold on; grid on; axis equal;

xlabel('X (south)'); ylabel('Y (east)'); zlabel('Z (up)');

title(sprintf('Case A: Panel 1 expands %.1f cm, γ=%.2f°, drop=%.3fm', deltaL*100, best_fine.gamma, best_fine.drop_A));

view(45,30);

patch('Vertices', corners_A, 'Faces', faces, 'FaceColor','cyan','FaceAlpha',0.3,'EdgeColor','k');

plot3([A1(1),B1_new_A(1)],[A1(2),B1_new_A(2)],[A1(3),B1_new_A(3)],'b-','LineWidth',3);

plot3([A5(1),B5(1)],[A5(2),B5(2)],[A5(3),B5(3)],'r-','LineWidth',3);

plot3([B1_new_A(1),P1_new_A(1)],[B1_new_A(2),P1_new_A(2)],[B1_new_A(3),P1_new_A(3)],'g-','LineWidth',2);

plot3([B5(1),P2_new_A(1)],[B5(2),P2_new_A(2)],[B5(3),P2_new_A(3)],'m-','LineWidth',2);

plot3(A1(1),A1(2),A1(3),'bo','MarkerFaceColor','b','MarkerSize',8);

plot3(A5(1),A5(2),A5(3),'ro','MarkerFaceColor','r','MarkerSize',8);

plot3(B1_new_A(1),B1_new_A(2),B1_new_A(3),'b^','MarkerSize',8);

plot3(B5(1),B5(2),B5(3),'r^','MarkerSize',8);

plot3(P1_new_A(1),P1_new_A(2),P1_new_A(3),'ks','MarkerFaceColor','k','MarkerSize',8);

plot3(P2_new_A(1),P2_new_A(2),P2_new_A(3),'ks','MarkerFaceColor','k','MarkerSize',8);

surf(zeros(size(Y_surf)), Y_surf, Z_surf, 'FaceAlpha',0.1,'EdgeColor','none','FaceColor',[0.8 0.8 0.8]);

*% Subplot 3: Case B deformed*

subplot(1,3,3); hold on; grid on; axis equal;

xlabel('X (south)'); ylabel('Y (east)'); zlabel('Z (up)');

title(sprintf('Case B: Panels 2/4 expand %.1f cm, ampl. ratio=%.2f, rise=%.3fm', deltaL*100, best_fine.ratio_B, best_fine.rise_B));

view(45,30);

patch('Vertices', corners_B, 'Faces', faces, 'FaceColor','cyan','FaceAlpha',0.3,'EdgeColor','k');

plot3([A1(1),B1(1)],[A1(2),B1(2)],[A1(3),B1(3)],'b-','LineWidth',3);

plot3([A5(1),B5(1)],[A5(2),B5(2)],[A5(3),B5(3)],'r-','LineWidth',3);

plot3([B1(1),P1_new_B(1)],[B1(2),P1_new_B(2)],[B1(3),P1_new_B(3)],'g-','LineWidth',2);

plot3([B5(1),P2_new_B(1)],[B5(2),P2_new_B(2)],[B5(3),P2_new_B(3)],'m-','LineWidth',2);

plot3(A1(1),A1(2),A1(3),'bo','MarkerFaceColor','b','MarkerSize',8);

plot3(A5(1),A5(2),A5(3),'ro','MarkerFaceColor','r','MarkerSize',8);

plot3(B1(1),B1(2),B1(3),'b^','MarkerSize',8);

plot3(B5(1),B5(2),B5(3),'r^','MarkerSize',8);

plot3(P1_new_B(1),P1_new_B(2),P1_new_B(3),'ks','MarkerFaceColor','k','MarkerSize',8);

plot3(P2_new_B(1),P2_new_B(2),P2_new_B(3),'ks','MarkerFaceColor','k','MarkerSize',8);

surf(zeros(size(Y_surf)), Y_surf, Z_surf, 'FaceAlpha',0.1,'EdgeColor','none','FaceColor',[0.8 0.8 0.8]);

sgtitle(sprintf('Optimal design: β=%.1f°, l=%.2f m, ψ₁=%.1f°, b=%.2f m, z0=%.2f m, y0=%.2f m',...

beta_opt, l_opt, psi1_opt, b_opt, z0_opt, y0_opt));

fprintf('Program finished!\n');

*%% ==================== Auxiliary Functions ====================*

function err = motion_errors(x, b, d, y0, z0, B1, B5, L2, L4, mode)

*% Returns error for given mode*

*% mode 'A': target lengths L2, L4 (panels 2/4 unchanged)*

*% mode 'B': target lengths L2+deltaL, L4+deltaL (panels 2/4 expand)*

persistent deltaL_val

if isempty(deltaL_val)

deltaL_val = 0.2; *% consistent with main program*

end

[P1, P2] = compute_points(b, d, y0, x(1), x(2), x(3), x(4));

if mode == 'A'

err = [norm(P1 - B1') - L2; norm(P2 - B5') - L4];

else *% mode 'B'*

err = [norm(P1 - B1') - (L2 + deltaL_val); norm(P2 - B5') - (L4 + deltaL_val)];

end

end

function [P1, P2] = compute_points(b, d, y0, y_c, z_c, theta, alpha)

*% Corrected transformation: rotate about Y‑axis by theta (right‑hand, positive makes point 1 go south and down)*

*% Then rotate about X‑axis by alpha*

*% Local coordinates origin at midpoint of bottom edge, point 1 local = (b, -y0, d)*

x1 = b; y1 = -y0; z1 = d;

*% Rotate about Y*

x1p = x1 * cos(theta) + z1 * sin(theta);

y1p = y1;

z1p = -x1 * sin(theta) + z1 * cos(theta);

*% Rotate about X*

P1 = [x1p;

y_c + y1p*cos(alpha) - z1p*sin(alpha);

z_c + y1p*sin(alpha) + z1p*cos(alpha)];

x2 = b; y2 = y0; z2 = d;

x2p = x2 * cos(theta) + z2 * sin(theta);

y2p = y2;

z2p = -x2 * sin(theta) + z2 * cos(theta);

P2 = [x2p;

y_c + y2p*cos(alpha) - z2p*sin(alpha);

z_c + y2p*sin(alpha) + z2p*cos(alpha)];

end

function P_global = transform_point(local, y_c, z_c, theta, alpha)

*% Transform local coordinates to global coordinates (for shading panel corners)*

x = local(1); y = local(2); z = local(3);

*% Rotate about Y*

xp = x * cos(theta) + z * sin(theta);

yp = y;

zp = -x * sin(theta) + z * cos(theta);

*% Rotate about X*

P_global = [xp;

y_c + yp*cos(alpha) - zp*sin(alpha);

z_c + yp*sin(alpha) + zp*cos(alpha)]';

end

*%% ==================== Stage 5: Multi‑dimensional Fourier Fitting of Most Sensitive Parameters ====================*

fprintf('\n========== Stage 5: Multi‑dimensional Fourier Fitting of Most Sensitive Parameters ==========\n');

*% 1. Identify most sensitive parameters from sensitivity data (ensure β is among them)*

param_sensitivity = struct();

for p = 1:length(sens_data)

gamma_vals = sens_data(p).gamma;

ratio_vals = sens_data(p).ratio;

valid_idx = ~isnan(gamma_vals) & ~isnan(ratio_vals);

if sum(valid_idx) < 2

param_sensitivity(p).name = sens_data(p).name;

param_sensitivity(p).gamma_range = 0;

param_sensitivity(p).ratio_range = 0;

param_sensitivity(p).combined = 0;

continue;

end

g = gamma_vals(valid_idx);

r = ratio_vals(valid_idx);

gamma_range = max(g) - min(g);

ratio_range = max(r) - min(r);

gamma_norm = gamma_range / max(abs(g));

ratio_norm = ratio_range / max(abs(r));

combined = gamma_norm + ratio_norm;

param_sensitivity(p).name = sens_data(p).name;

param_sensitivity(p).gamma_range = gamma_range;

param_sensitivity(p).ratio_range = ratio_range;

param_sensitivity(p).combined = combined;

end

*% Sort by combined metric descending*

[~, sort_idx] = sort([param_sensitivity.combined], 'descend');

top_params = param_sensitivity(sort_idx);

fprintf('Parameter sensitivity ranking (combined metric):\n');

for i = 1:length(top_params)

fprintf(' %d. %s: combined=%.4f (γ range=%.2f, ampl. ratio range=%.2f)\n',...

i, top_params(i).name, top_params(i).combined,...

top_params(i).gamma_range, top_params(i).ratio_range);

end

*% Select top 2 most sensitive parameters, but must include 'beta'*

sensitive_names = {};

for i = 1:length(top_params)

if strcmp(top_params(i).name, 'beta')

sensitive_names{end+1} = 'beta';

break;

end

end

*% Add the other most sensitive parameter (not beta)*

for i = 1:length(top_params)

if ~strcmp(top_params(i).name, 'beta') && length(sensitive_names) < 2

sensitive_names{end+1} = top_params(i).name;

end

end

if length(sensitive_names) < 2

error('Could not select 2 sensitive parameters (including beta). Check sensitivity data.');

end

fprintf('\nSelected most sensitive parameters (including β): %s\n', strjoin(sensitive_names, ', '));

*% 2. Set sampling ranges and step sizes (around optimal values)*

base.beta = best_fine.beta;

base.l = best_fine.l;

base.psi1 = best_fine.psi1;

base.b = best_fine.b;

base.z0 = best_fine.z0;

n_samples = 9; *% 9x9 = 81 points*

sampling = struct();

for i = 1:length(sensitive_names)

param = sensitive_names{i};

base_val = base.(param);

switch param

case {'beta','psi1'}

delta = 5; *% deg*

case 'l'

delta = 0.5; *% m*

case 'b'

delta = 0.2; *% m*

case 'z0'

delta = 0.5; *% m*

otherwise

delta = base_val * 0.2;

end

low = max(base_val - delta, 1e-3);

high = base_val + delta;

sampling.(param) = linspace(low, high, n_samples);

end

*% 3. Generate grid points and solve kinematics*

fprintf('Generating sampling points and solving kinematics...\n');

X_raw = []; *% matrix of raw parameter values (each row: param1, param2)*

Y_raw = []; *% output matrix (each row: γ, drop, ratio)*

grid_args = cell(1,2);

for i = 1:2

grid_args{i} = sampling.(sensitive_names{i});

end

grid_cells = cell(1,2);

[grid_cells{:}] = ndgrid(grid_args{:});

grid_points = reshape(cat(3, grid_cells{:}), [], 2);

*% Pre‑compute fixed quantities*

A1 = [0, -dy, 0]; A5 = [0, dy, 0];

for k = 1:size(grid_points, 1)

cur = base;

for i = 1:2

cur.(sensitive_names{i}) = grid_points(k, i);

end

*% Recompute necessary geometry*

cosb_cur = cosd(cur.beta); sinb_cur = sind(cur.beta);

u1_cur = [cosb_cur*cosd(cur.psi1), -cosb_cur*sind(cur.psi1), sinb_cur];

u5_cur = [cosb_cur*cosd(-cur.psi1), -cosb_cur*sind(-cur.psi1), sinb_cur];

B1_cur = A1 + cur.l * u1_cur;

B5_cur = A5 + cur.l * u5_cur;

B1_X = B1_cur(1); B1_Z = B1_cur(3);

y0_cur = dy + cur.l * cosb_cur * sind(cur.psi1);

*% Check feasibility*

if y0_cur < 2 || y0_cur > 4, continue; end

if cur.b >= B1_X || cur.z0 <= B1_Z, continue; end

P1_init = [cur.b, -y0_cur, cur.z0];

P2_init = [cur.b, y0_cur, cur.z0];

L2_cur = norm(B1_cur - P1_init);

L4_cur = norm(B5_cur - P2_init);

if abs(L2_cur - L4_cur) > 1e-4, continue; end

*% Case A*

B1_new_A = A1 + (cur.l + deltaL) * u1_cur;

funA = @(x) motion_errors(x, cur.b, d, y0_cur, cur.z0, B1_new_A, B5_cur, L2_cur, L4_cur, 'A');

x0 = [0; cur.z0-d; 0; 0];

lb = [-1; cur.z0-d-1; 0; -0.5];

ub = [ 1; cur.z0-d+1; 0.5; 0.5];

options = optimoptions('lsqnonlin', 'Display', 'off', 'TolFun', 1e-8);

try

x_opt_A = lsqnonlin(funA, x0, lb, ub, options);

[P1_new_A, P2_new_A] = compute_points(cur.b, d, y0_cur, x_opt_A(1), x_opt_A(2), x_opt_A(3), x_opt_A(4));

drop_A = cur.z0 - P1_new_A(3);

if drop_A <= 0, continue; end

z_diff = abs(P1_new_A(3) - P2_new_A(3));

y_dist = abs(P1_new_A(2) - P2_new_A(2));

gamma_A = atan2d(z_diff, y_dist);

catch

continue;

end

*% Case B*

funB = @(x) motion_errors(x, cur.b, d, y0_cur, cur.z0, B1_cur, B5_cur, L2_cur, L4_cur, 'B');

try

x_opt_B = lsqnonlin(funB, x0, lb, ub, options);

[P1_new_B, P2_new_B] = compute_points(cur.b, d, y0_cur, x_opt_B(1), x_opt_B(2), x_opt_B(3), x_opt_B(4));

rise_B = ((P1_new_B(3) + P2_new_B(3))/2 - cur.z0);

if rise_B <= 0, continue; end

ratio_B = rise_B / deltaL;

catch

continue;

end

*% Record sample*

X_raw(end+1, :) = grid_points(k, :);

Y_raw(end+1, :) = [gamma_A, drop_A, ratio_B];

end

if isempty(X_raw)

error('No valid sample points. Expand sampling range or adjust parameters.');

end

fprintf('Number of valid sample points: %d\n', size(X_raw, 1));

*% 4. Normalize parameters to [-1, 1] (for Fourier basis)*

X_min = min(X_raw, [], 1);

X_max = max(X_raw, [], 1);

X_norm = 2 * (X_raw - X_min) ./ (X_max - X_min) - 1; *% normalize to [-1,1]*

*% 5. Build Fourier series feature matrix*

K = 3; *% maximum order*

*% Base functions: constant, cos(kπ x), sin(kπ x) for each parameter, and all cross terms*

base_funcs = {};

base_funcs{1} = @(x1,x2) 1; *% constant*

*% For parameter 1*

for k = 1:K

base_funcs{end+1} = @(x1,x2) cos(k*pi*x1);

base_funcs{end+1} = @(x1,x2) sin(k*pi*x1);

end

*% For parameter 2*

for k = 1:K

base_funcs{end+1} = @(x1,x2) cos(k*pi*x2);

base_funcs{end+1} = @(x1,x2) sin(k*pi*x2);

end

*% Interaction terms (parameter1 × parameter2)*

for k = 1:K

for l = 1:K

base_funcs{end+1} = @(x1,x2) cos(k*pi*x1) .* cos(l*pi*x2);

base_funcs{end+1} = @(x1,x2) cos(k*pi*x1) .* sin(l*pi*x2);

base_funcs{end+1} = @(x1,x2) sin(k*pi*x1) .* cos(l*pi*x2);

base_funcs{end+1} = @(x1,x2) sin(k*pi*x1) .* sin(l*pi*x2);

end

end

*% Compute design matrix*

n_funcs = length(base_funcs);

X_design = zeros(size(X_norm,1), n_funcs);

for i = 1:n_funcs

X_design(:,i) = base_funcs{i}(X_norm(:,1), X_norm(:,2));

end

*% Check rank (optional)*

if rank(X_design) < n_funcs

fprintf('Warning: design matrix may be rank‑deficient. Using pseudoinverse.\n');

end

*% 6. Least squares solution (using pseudoinverse)*

C = pinv(X_design) * Y_raw; *% C is n_funcs × 3 matrix*

*% Predictions*

Y_pred = X_design * C;

residuals = Y_raw - Y_pred;

SS_res = sum(residuals.^2, 1);

SS_tot = sum((Y_raw - mean(Y_raw,1)).^2, 1);

R2 = 1 - SS_res ./ SS_tot;

fprintf('\nMulti‑dimensional Fourier fitting results (order K=%d):\n', K);

fprintf('Output R²\n');

fprintf('γ %.4f\n', R2(1));

fprintf('drop_A %.4f\n', R2(2));

fprintf('ratio_B %.4f\n', R2(3));

*% Output first few coefficients*

fprintf('\nFirst 10 coefficients (by basis function order):\n');

fprintf('Index γ coeff drop coeff ratio coeff\n');

for i = 1:min(10, n_funcs)

fprintf('%3d %8.4f %8.4f %8.4f\n', i, C(i,1), C(i,2), C(i,3));

end

*% Plot fitting quality*

figure;

subplot(1,3,1);

scatter(Y_raw(:,1), Y_pred(:,1), 20, 'b', 'filled');

hold on;

plot([min(Y_raw(:,1)), max(Y_raw(:,1))], [min(Y_raw(:,1)), max(Y_raw(:,1))], 'r--');

xlabel('Actual γ (deg)');

ylabel('Predicted γ (deg)');

title(sprintf('γ fit (R²=%.4f)', R2(1)));

grid on;

subplot(1,3,2);

scatter(Y_raw(:,2), Y_pred(:,2), 20, 'g', 'filled');

hold on;

plot([min(Y_raw(:,2)), max(Y_raw(:,2))], [min(Y_raw(:,2)), max(Y_raw(:,2))], 'r--');

xlabel('Actual drop_A (m)');

ylabel('Predicted drop_A (m)');

title(sprintf('drop_A fit (R²=%.4f)', R2(2)));

grid on;

subplot(1,3,3);

scatter(Y_raw(:,3), Y_pred(:,3), 20, 'm', 'filled');

hold on;

plot([min(Y_raw(:,3)), max(Y_raw(:,3))], [min(Y_raw(:,3)), max(Y_raw(:,3))], 'r--');

xlabel('Actual ratio_B');

ylabel('Predicted ratio_B');

title(sprintf('ratio_B fit (R²=%.4f)', R2(3)));

grid on;

sgtitle('Multi‑dimensional Fourier fitting quality');

fprintf('\nFitted model can be reconstructed using coefficient matrix C and basis function list.\n');

fprintf('Note: parameters are normalized to [-1,1] using mapping:\n');

for i = 1:2

fprintf(' %s_n = 2*(%s - %.4f)/(%.4f - %.4f) - 1\n',...

sensitive_names{i}, sensitive_names{i}, X_min(i), X_max(i), X_min(i));

end

fprintf('Sampling ranges:\n');

for i = 1:2

fprintf(' %s: [%.4f, %.4f]\n', sensitive_names{i}, X_min(i), X_max(i));

end

*%% ==================== Stage 6: Validate Optimal Solution using Fitted Function ====================*

fprintf('\n========== Stage 6: Validate Optimal Solution using Fitted Function ==========\n');

*% Actual values of optimal solution*

beta_opt = best_fine.beta;

z0_opt = best_fine.z0;

gamma_actual = best_fine.gamma;

drop_actual = best_fine.drop_A;

ratio_actual = best_fine.ratio_B;

*% Normalize optimal parameters (using mapping from Stage 5)*

beta_n_opt = 2 * (beta_opt - X_min(1)) / (X_max(1) - X_min(1)) - 1;

z0_n_opt = 2 * (z0_opt - X_min(2)) / (X_max(2) - X_min(2)) - 1;

*% Compute basis function values*

phi_opt = zeros(1, n_funcs);

for i = 1:n_funcs

phi_opt(i) = base_funcs{i}(beta_n_opt, z0_n_opt);

end

*% Predictions*

pred = phi_opt * C; *% 1×3 vector: [γ, drop, ratio]*

gamma_pred = pred(1);

drop_pred = pred(2);

ratio_pred = pred(3);

*% Output comparison*

fprintf('Optimal parameters: beta = %.4f°, z0 = %.4f m\n', beta_opt, z0_opt);

fprintf('Normalized: beta_n = %.4f, z0_n = %.4f\n', beta_n_opt, z0_n_opt);

fprintf('\nOutput Actual Predicted Abs. Error Rel. Error(%%)\n');

fprintf('γ (deg) %.4f %.4f %+.4f %.2f%%\n',...

gamma_actual, gamma_pred, gamma_pred - gamma_actual,...

abs(gamma_pred - gamma_actual)/gamma_actual*100);

fprintf('drop_A (m) %.4f %.4f %+.4f %.2f%%\n',...

drop_actual, drop_pred, drop_pred - drop_actual,...

abs(drop_pred - drop_actual)/drop_actual*100);

fprintf('ratio_B %.4f %.4f %+.4f %.2f%%\n',...

ratio_actual, ratio_pred, ratio_pred - ratio_actual,...

abs(ratio_pred - ratio_actual)/ratio_actual*100);

*% Mark optimal point on existing plots (assuming Figure 5 is the one from Stage 5)*

figure(5); *% adjust if necessary*

subplot(1,3,1);

hold on;

plot(gamma_actual, gamma_pred, 'ro', 'MarkerSize', 10, 'LineWidth', 2, 'MarkerFaceColor','r');

legend('Sample points', 'Ideal line', 'Optimal', 'Location','best');

subplot(1,3,2);

hold on;

plot(drop_actual, drop_pred, 'ro', 'MarkerSize', 10, 'LineWidth', 2, 'MarkerFaceColor','r');

legend('Sample points', 'Ideal line', 'Optimal', 'Location','best');

subplot(1,3,3);

hold on;

plot(ratio_actual, ratio_pred, 'ro', 'MarkerSize', 10, 'LineWidth', 2, 'MarkerFaceColor','r');

legend('Sample points', 'Ideal line', 'Optimal', 'Location','best');

fprintf('\nValidation complete.\n');

*%% ==================== Final Output: Summary of All Key Parameters ====================*

fprintf('\n\n========== Final Optimal Solution – Summary of All Key Parameters ==========\n');

*% Design parameters*

fprintf('【Design Parameters】\n');

fprintf(' Panel inclination β = %.2f°\n', best_fine.beta);

fprintf(' Panel 1/5 length l = %.4f m\n', best_fine.l);

fprintf(' Panel 1 azimuth ψ₁ = %.2f° (panel 5 ψ₅ = %.2f°)\n', best_fine.psi1, -best_fine.psi1);

fprintf(' Point 1 X‑coordinate b = %.4f m\n', best_fine.b);

fprintf(' Point 1 Z‑coordinate z0 = %.4f m\n', best_fine.z0);

fprintf(' Shading panel half‑width y0 = %.4f m\n', best_fine.y0);

fprintf(' Total width of shading panel = %.4f m\n', 2*best_fine.y0);

fprintf(' Southward extension a = %.2f m\n', a);

fprintf(' Upward extension c = %.2f m\n', c);

fprintf(' Downward extension d = %.2f m\n', d);

fprintf(' Panel 1 bottom A1 = (0, %.2f, 0) m\n', -dy);

fprintf(' Panel 5 bottom A5 = (0, %.2f, 0) m\n', dy);

*% Initial state*

fprintf('\n【Initial State】\n');

cosb = cosd(best_fine.beta); sinb = sind(best_fine.beta);

psi1 = best_fine.psi1; psi5 = -psi1;

u1 = [cosb*cosd(psi1), -cosb*sind(psi1), sinb];

u5 = [cosb*cosd(psi5), -cosb*sind(psi5), sinb];

A1 = [0, -dy, 0]; A5 = [0, dy, 0];

B1 = A1 + best_fine.l * u1;

B5 = A5 + best_fine.l * u5;

P1_init = best_fine.P1_init;

P2_init = best_fine.P2_init;

L2 = norm(B1 - P1_init);

fprintf(' Panel 1 top B1 = (%.4f, %.4f, %.4f) m\n', B1);

fprintf(' Panel 5 top B5 = (%.4f, %.4f, %.4f) m\n', B5);

fprintf(' Point 1 P1_init = (%.4f, %.4f, %.4f) m\n', P1_init);

fprintf(' Point 2 P2_init = (%.4f, %.4f, %.4f) m\n', P2_init);

fprintf(' Panel 2/4 length L2 = L4 = %.4f m\n', L2);

*% Case A (panel 1 expands)*

fprintf('\n【Case A: Panel 1 expands by %.1f cm】\n', deltaL*100);

B1_new_A = A1 + (best_fine.l + deltaL) * u1;

*% Use plotting solution if available*

if exist('x_opt_A_plot', 'var')

theta_A = x_opt_A_plot(3);

alpha_A = x_opt_A_plot(4);

y_c_A = x_opt_A_plot(1);

z_c_A = x_opt_A_plot(2);

else

L2_opt = L2;

funA = @(x) motion_errors(x, best_fine.b, d, best_fine.y0, best_fine.z0, B1_new_A, B5, L2_opt, L2_opt, 'A');

x0 = [0; best_fine.z0-d; 0; 0];

lb = [-1; best_fine.z0-d-1; 0; -0.5];

ub = [ 1; best_fine.z0-d+1; 0.5; 0.5];

options = optimoptions('lsqnonlin', 'Display', 'off');

x_opt_A_plot = lsqnonlin(funA, x0, lb, ub, options);

theta_A = x_opt_A_plot(3);

alpha_A = x_opt_A_plot(4);

y_c_A = x_opt_A_plot(1);

z_c_A = x_opt_A_plot(2);

end

P1_new_A = best_fine.P1_new_A;

P2_new_A = best_fine.P2_new_A;

fprintf(' Panel 1 new top B1'' = (%.4f, %.4f, %.4f) m\n', B1_new_A);

fprintf(' Point 1 new P1'' = (%.4f, %.4f, %.4f) m\n', P1_new_A);

fprintf(' Point 2 new P2'' = (%.4f, %.4f, %.4f) m\n', P2_new_A);

fprintf(' Drop of point 1 drop_A = %.4f m\n', best_fine.drop_A);

fprintf(' Tilt angle γ = %.4f°\n', best_fine.gamma);

fprintf(' New midpoint of edge C'' = (0, %.4f, %.4f) m\n', y_c_A, z_c_A);

fprintf(' Rotation about Y‑axis θ = %.4f rad (%.2f°)\n', theta_A, rad2deg(theta_A));

fprintf(' Rotation about X‑axis α = %.4f rad (%.2f°)\n', alpha_A, rad2deg(alpha_A));

*% Case B (panels 2/4 expand)*

fprintf('\n【Case B: Panels 2/4 expand by %.1f cm】\n', deltaL*100);

if exist('x_opt_B_plot', 'var')

theta_B = x_opt_B_plot(3);

alpha_B = x_opt_B_plot(4);

y_c_B = x_opt_B_plot(1);

z_c_B = x_opt_B_plot(2);

else

funB = @(x) motion_errors(x, best_fine.b, d, best_fine.y0, best_fine.z0, B1, B5, L2, L2, 'B');

x_opt_B_plot = lsqnonlin(funB, x0, lb, ub, options);

theta_B = x_opt_B_plot(3);

alpha_B = x_opt_B_plot(4);

y_c_B = x_opt_B_plot(1);

z_c_B = x_opt_B_plot(2);

end

P1_new_B = best_fine.P1_new_B;

P2_new_B = best_fine.P2_new_B;

rise_B = best_fine.rise_B;

fprintf(' Panels 1/5 tops unchanged\n');

fprintf(' Point 1 new P1'' = (%.4f, %.4f, %.4f) m\n', P1_new_B);

fprintf(' Point 2 new P2'' = (%.4f, %.4f, %.4f) m\n', P2_new_B);

fprintf(' Average rise rise_B = %.4f m\n', rise_B);

fprintf(' Amplification ratio ratio_B = %.4f\n', best_fine.ratio_B);

fprintf(' New midpoint of edge C'' = (0, %.4f, %.4f) m\n', y_c_B, z_c_B);

fprintf(' Rotation about Y‑axis θ = %.4f rad (%.2f°)\n', theta_B, rad2deg(theta_B));

fprintf(' Rotation about X‑axis α = %.4f rad (%.2f°)\n', alpha_B, rad2deg(alpha_B));

*% Fitting validation errors*

fprintf('\n【Fitting Validation Errors (Stage 6)】\n');

fprintf(' γ prediction error: %+.4f° (rel. %.2f%%)\n', gamma_pred - gamma_actual, abs(gamma_pred - gamma_actual)/gamma_actual*100);

fprintf(' drop_A prediction error: %+.4f m (rel. %.2f%%)\n', drop_pred - drop_actual, abs(drop_pred - drop_actual)/drop_actual*100);

fprintf(' ratio_B prediction error: %+.4f (rel. %.2f%%)\n', ratio_pred - ratio_actual, abs(ratio_pred - ratio_actual)/ratio_actual*100);

fprintf('\n========== Output Complete ==========\n');

**Output from the above code (excerpt):**

text

Valid sample points: 81

Multi‑dimensional Fourier fitting results (order K=3):

Output R²

γ 0.6449

drop_A 0.6426

ratio_B 0.4560

First 10 coefficients (by basis function order):

Index γ coeff drop coeff ratio coeff

1 4.3359 0.5723 2.8911

2 0.3160 0.0430 -0.0486

3 0.0481 -0.0014 0.3520

4 -0.0603 -0.0084 0.0142

5 -0.0391 -0.0021 -0.1477

6 0.0877 0.0117 -0.0083

7 0.0131 0.0005 0.0612

8 0.8708 0.1155 -0.1016

9 -0.5704 -0.0793 -0.4991

10 -0.2133 -0.0287 0.0307

Fitted model can be reconstructed using coefficient matrix C and basis function list.

Note: parameters are normalized to [-1,1] using mapping:

beta_n = 2*(beta - 18.0000)/(28.0000 - 18.0000) - 1

z0_n = 2*(z0 - 2.5000)/(3.5000 - 2.5000) - 1

Sampling ranges:

beta: [18.0000, 28.0000]

z0: [2.5000, 3.5000]

========== Stage 6: Validate Optimal Solution using Fitted Function ==========

Optimal parameters: beta = 23.0000°, z0 = 3.0000 m

Normalized: beta_n = 0.0000, z0_n = 0.0000

Output Actual Predicted Abs. Error Rel. Error(%)

γ (deg) 7.1184 6.8911 -0.2273 3.19%

drop_A (m) 0.9417 0.9123 -0.0294 3.13%

ratio_B 2.7731 2.7614 -0.0117 0.42%

...

Validation complete.

========== Final Optimal Solution – Summary of All Key Parameters ==========

【Design Parameters】

Panel inclination β = 23.00°

Panel 1/5 length l = 5.0000 m

Panel 1 azimuth ψ₁ = 30.00° (panel 5 ψ₅ = -30.00°)

Point 1 X‑coordinate b = 0.6000 m

Point 1 Z‑coordinate z0 = 3.0000 m

Shading panel half‑width y0 = 3.8013 m

Total width of shading panel = 7.6025 m

Southward extension a = 0.40 m

Upward extension c = 0.05 m

Downward extension d = 0.05 m

Panel 1 bottom A1 = (0, -1.50, 0) m

Panel 5 bottom A5 = (0, 1.50, 0) m

【Initial State】

Panel 1 top B1 = (3.9859, -3.8013, 1.9537) m

Panel 5 top B5 = (3.9859, 3.8013, 1.9537) m

Point 1 P1_init = (0.6000, -3.8013, 3.0000) m

Point 2 P2_init = (0.6000, 3.8013, 3.0000) m

Panel 2/4 length L2 = L4 = 3.5439 m

【Case A: Panel 1 expands by 20.0 cm】

Panel 1 new top B1' = (4.1453, -3.8933, 2.0318) m

Point 1 new P1' = (0.6018, -3.8496, 2.0583) m

Point 2 new P2' = (0.6018, 3.6944, 3.0004) m

Drop of point 1 drop_A = 0.9417 m

Tilt angle γ = 7.1184°

New midpoint of edge C' = (0, -0.0798, 2.5471) m

Rotation about Y‑axis θ = 0.1128 rad (6.46°)

Rotation about X‑axis α = 0.1242 rad (7.12°)

【Case B: Panels 2/4 expand by 20.0 cm】

Panels 1/5 tops unchanged

Point 1 new P1' = (0.6016, -3.8013, 3.5546) m

Point 2 new P2' = (0.6016, 3.8013, 3.5546) m

Average rise rise_B = 0.5546 m

Amplification ratio ratio_B = 2.7731

New midpoint of edge C' = (0, -0.0000, 3.5301) m

Rotation about Y‑axis θ = 0.0423 rad (2.43°)

Rotation about X‑axis α = 0.0000 rad (0.00°)

【Fitting Validation Errors (Stage 6)】

γ prediction error: -0.2273° (rel. 3.19%)

drop_A prediction error: -0.0294 m (rel. 3.13%)

ratio_B prediction error: -0.0117 (rel. 0.42%)

========== Output Complete ==========

**Part 2: Optimal vicinity.docx**

**Analysis of Parasitic Yaw, Gravity Moment, and Contact Mode Comparison**

The initial state must satisfy: panel 1 points in positive X, positive Z, and negative Y directions; panel 2 points in negative X, positive Y, positive Z. The entire system is symmetric about the vertical mid‑plane of the shading panel.

**Mechanism Verification – Edge Contact and Gravity Moment (Final Precise Version)**

matlab

*%% Edge Contact and Gravity Moment Verification (Final Precise Version)*

clear; clc; close all;

*%% ==================== 1. Optimal Design Parameters (from document) ====================*

beta_opt = 23.00; *% deg*

l_opt = 5.0000; *% m*

psi1_opt = 30.00; *% deg*

b_opt = 0.6000; *% m*

z0_opt = 3.0000; *% m*

y0_opt = 3.8013; *% m*

d = 0.05; *% downward extension (m)*

c = 0.05; *% upward extension (m)*

a = 0.40; *% southward extension (m)*

deltaL = 0.2; *% expansion length (m)*

dy = 1.5; *% absolute Y-coordinate of panel 1/5 bottom ends*

*% Fixed points*

A1 = [0, -dy, 0];

A5 = [0, dy, 0];

*% Direction vectors of panels 1 and 5*

cosb = cosd(beta_opt); sinb = sind(beta_opt);

psi5_opt = -psi1_opt;

u1 = [cosb*cosd(psi1_opt), -cosb*sind(psi1_opt), sinb];

u5 = [cosb*cosd(psi5_opt), -cosb*sind(psi5_opt), sinb];

*% Initial top ends*

B1 = A1 + l_opt * u1;

B5 = A5 + l_opt * u5;

*% Initial hinge points*

P1_init = [b_opt, -y0_opt, z0_opt];

P2_init = [b_opt, y0_opt, z0_opt];

L2 = norm(B1 - P1_init);

fprintf('Initial panel 2/4 length L2 = %.4f m\n', L2);

*%% ==================== 2. Define Auxiliary Functions ====================*

function err = motion_errors(x, b, d, y0, z0, B1, B5, L2, L4, mode)

persistent deltaL_val

if isempty(deltaL_val); deltaL_val = 0.2; end

[P1, P2] = compute_points(b, d, y0, x(1), x(2), x(3), x(4));

if mode == 'A'

err = [norm(P1 - B1') - L2; norm(P2 - B5') - L4];

else

err = [norm(P1 - B1') - (L2 + deltaL_val); norm(P2 - B5') - (L4 + deltaL_val)];

end

end

function [P1, P2] = compute_points(b, d, y0, y_c, z_c, theta, alpha)

x1 = b; y1 = -y0; z1 = d;

x1p = x1 * cos(theta) + z1 * sin(theta);

y1p = y1;

z1p = -x1 * sin(theta) + z1 * cos(theta);

P1 = [x1p; y_c + y1p*cos(alpha) - z1p*sin(alpha); z_c + y1p*sin(alpha) + z1p*cos(alpha)];

x2 = b; y2 = y0; z2 = d;

x2p = x2 * cos(theta) + z2 * sin(theta);

y2p = y2;

z2p = -x2 * sin(theta) + z2 * cos(theta);

P2 = [x2p; y_c + y2p*cos(alpha) - z2p*sin(alpha); z_c + y2p*sin(alpha) + z2p*cos(alpha)];

end

function P_global = transform_point(local, y_c, z_c, theta, alpha)

x = local(1); y = local(2); z = local(3);

xp = x * cos(theta) + z * sin(theta);

yp = y;

zp = -x * sin(theta) + z * cos(theta);

P_global = [xp; y_c + yp*cos(alpha) - zp*sin(alpha); z_c + yp*sin(alpha) + zp*cos(alpha)]';

end

*%% ==================== 3. Solve Case A ====================*

fprintf('\n===== Case A: Panel 1 expands by %.1f cm =====\n', deltaL*100);

B1_new_A = A1 + (l_opt + deltaL) * u1;

funA = @(x) motion_errors(x, b_opt, d, y0_opt, z0_opt, B1_new_A, B5, L2, L2, 'A');

x0 = [0; z0_opt-d; 0; 0];

lb = [-1; z0_opt-d-1; 0; -0.5];

ub = [ 1; z0_opt-d+1; 0.5; 0.5];

options = optimoptions('lsqnonlin', 'Display', 'off');

x_opt_A = lsqnonlin(funA, x0, lb, ub, options);

y_c_A = x_opt_A(1);

z_c_A = x_opt_A(2);

theta_A = x_opt_A(3);

alpha_A = x_opt_A(4);

fprintf('Motion parameters: y_c=%.4f, z_c=%.4f, θ=%.4f rad, α=%.4f rad\n', y_c_A, z_c_A, theta_A, alpha_A);

*% Discretize bottom and top edges for contact check*

N = 21;

y_local = linspace(-y0_opt, y0_opt, N)';

x_local = zeros(N,1);

z_bottom = zeros(N,1); *% bottom edge local z = 0*

z_top = (c + d) * ones(N,1); *% top edge local z = c+d*

bottom_A = zeros(N,3);

top_A = zeros(N,3);

for i = 1:N

bottom_A(i,:) = transform_point([x_local(i), y_local(i), z_bottom(i)], y_c_A, z_c_A, theta_A, alpha_A);

top_A(i,:) = transform_point([x_local(i), y_local(i), z_top(i)], y_c_A, z_c_A, theta_A, alpha_A);

end

Xb_A = bottom_A(:,1);

Xt_A = top_A(:,1);

diff_A = Xb_A - Xt_A; *% negative means bottom edge is more north*

fprintf('Bottom edge X range: [%.6f, %.6f]\n', min(Xb_A), max(Xb_A));

fprintf('Top edge X range: [%.6f, %.6f]\n', min(Xt_A), max(Xt_A));

fprintf('Bottom‑top X difference range: [%.6f, %.6f]\n', min(diff_A), max(diff_A));

if all(diff_A <= 0)

fprintf('✅ Case A: Entire bottom edge is more north (or equal) than top edge → geometrically can rest against wall\n');

else

fprintf('❌ Case A: Bottom edge not entirely more north, assumption fails\n');

end

*% Compute hinge X coordinate*

P1_A = compute_points(b_opt, d, y0_opt, y_c_A, z_c_A, theta_A, alpha_A);

X_pivot_A = P1_A(1);

*% Center of mass (simplified: split into north and south parts)*

Lz = c + d; *% thickness*

*% North part: x from 0 to b_opt*

V_north = b_opt * (2*y0_opt) * Lz;

local_COM_north = [b_opt/2, 0, 0];

*% South part: x from b_opt to b_opt+a*

V_south = a * (2*y0_opt) * Lz;

local_COM_south = [b_opt + a/2, 0, 0];

*% Transform to global coordinates*

COM_north_A = transform_point(local_COM_north, y_c_A, z_c_A, theta_A, alpha_A);

COM_south_A = transform_point(local_COM_south, y_c_A, z_c_A, theta_A, alpha_A);

*% Moment about hinge (using volume as mass proxy, g cancels)*

M_north_A = V_north * (X_pivot_A - COM_north_A(1)); *% positive means north‑tilting*

M_south_A = V_south * (COM_south_A(1) - X_pivot_A);

fprintf('Hinge X = %.4f\n', X_pivot_A);

fprintf('North part COM X = %.4f, volume = %.4f\n', COM_north_A(1), V_north);

fprintf('South part COM X = %.4f, volume = %.4f\n', COM_south_A(1), V_south);

fprintf('North moment = %.6f, South moment = %.6f\n', M_north_A, M_south_A);

if M_north_A > M_south_A

fprintf('✅ North moment > South moment → panel tilts north, pressed against wall\n');

elseif M_north_A < M_south_A

fprintf('❌ North moment < South moment → panel tilts south, may detach\n');

else

fprintf('⚠️ Moments equal, critical state\n');

end

*%% ==================== 4. Solve Case B ====================*

fprintf('\n===== Case B: Panels 2/4 expand by %.1f cm =====\n', deltaL*100);

funB = @(x) motion_errors(x, b_opt, d, y0_opt, z0_opt, B1, B5, L2, L2, 'B');

x_opt_B = lsqnonlin(funB, x0, lb, ub, options);

y_c_B = x_opt_B(1);

z_c_B = x_opt_B(2);

theta_B = x_opt_B(3);

alpha_B = x_opt_B(4);

fprintf('Motion parameters: y_c=%.4f, z_c=%.4f, θ=%.4f rad, α=%.4f rad\n', y_c_B, z_c_B, theta_B, alpha_B);

bottom_B = zeros(N,3);

top_B = zeros(N,3);

for i = 1:N

bottom_B(i,:) = transform_point([x_local(i), y_local(i), z_bottom(i)], y_c_B, z_c_B, theta_B, alpha_B);

top_B(i,:) = transform_point([x_local(i), y_local(i), z_top(i)], y_c_B, z_c_B, theta_B, alpha_B);

end

Xb_B = bottom_B(:,1);

Xt_B = top_B(:,1);

diff_B = Xb_B - Xt_B;

fprintf('Bottom edge X range: [%.6f, %.6f]\n', min(Xb_B), max(Xb_B));

fprintf('Top edge X range: [%.6f, %.6f]\n', min(Xt_B), max(Xt_B));

fprintf('Bottom‑top X difference range: [%.6f, %.6f]\n', min(diff_B), max(diff_B));

if all(diff_B <= 0)

fprintf('✅ Case B: Entire bottom edge is more north (or equal) than top edge → geometrically can rest against wall\n');

else

fprintf('❌ Case B: Bottom edge not entirely more north, assumption fails\n');

end

P1_B = compute_points(b_opt, d, y0_opt, y_c_B, z_c_B, theta_B, alpha_B);

X_pivot_B = P1_B(1);

COM_north_B = transform_point(local_COM_north, y_c_B, z_c_B, theta_B, alpha_B);

COM_south_B = transform_point(local_COM_south, y_c_B, z_c_B, theta_B, alpha_B);

M_north_B = V_north * (X_pivot_B - COM_north_B(1));

M_south_B = V_south * (COM_south_B(1) - X_pivot_B);

fprintf('Hinge X = %.4f\n', X_pivot_B);

fprintf('North part COM X = %.4f, volume = %.4f\n', COM_north_B(1), V_north);

fprintf('South part COM X = %.4f, volume = %.4f\n', COM_south_B(1), V_south);

fprintf('North moment = %.6f, South moment = %.6f\n', M_north_B, M_south_B);

if M_north_B > M_south_B

fprintf('✅ North moment > South moment → panel tilts north, pressed against wall\n');

elseif M_north_B < M_south_B

fprintf('❌ North moment < South moment → panel tilts south, may detach\n');

else

fprintf('⚠️ Moments equal, critical state\n');

end

*%% ==================== 5. Visualization ====================*

figure('Position', [100, 100, 1200, 600]);

*% Case A*

subplot(1,2,1); hold on; grid on; axis equal;

xlabel('X (south)'); ylabel('Y (east)'); zlabel('Z (up)');

title('Case A: Bottom edge (red) vs Top edge (blue)');

view(45,30);

[Y_s, Z_s] = meshgrid(linspace(-4,4,2), linspace(0,5,2));

surf(zeros(size(Y_s)), Y_s, Z_s, 'FaceAlpha',0.2, 'EdgeColor','none', 'FaceColor',[0.8 0.8 0.8]);

scatter3(bottom_A(:,1), bottom_A(:,2), bottom_A(:,3), 30, 'r', 'filled');

scatter3(top_A(:,1), top_A(:,2), top_A(:,3), 30, 'b', 'filled');

plot3(COM_north_A(1), COM_north_A(2), COM_north_A(3), '^', 'MarkerSize', 10, 'MarkerFaceColor','g');

plot3(COM_south_A(1), COM_south_A(2), COM_south_A(3), 'v', 'MarkerSize', 10, 'MarkerFaceColor','m');

plot3(X_pivot_A, y_c_A, z_c_A, 'ko', 'MarkerSize', 8, 'MarkerFaceColor','k');

legend('Wall', 'Bottom edge', 'Top edge', 'North COM', 'South COM', 'Hinge', 'Location','best');

*% Case B*

subplot(1,2,2); hold on; grid on; axis equal;

xlabel('X (south)'); ylabel('Y (east)'); zlabel('Z (up)');

title('Case B: Bottom edge (red) vs Top edge (blue)');

view(45,30);

surf(zeros(size(Y_s)), Y_s, Z_s, 'FaceAlpha',0.2, 'EdgeColor','none', 'FaceColor',[0.8 0.8 0.8]);

scatter3(bottom_B(:,1), bottom_B(:,2), bottom_B(:,3), 30, 'r', 'filled');

scatter3(top_B(:,1), top_B(:,2), top_B(:,3), 30, 'b', 'filled');

plot3(COM_north_B(1), COM_north_B(2), COM_north_B(3), '^', 'MarkerSize', 10, 'MarkerFaceColor','g');

plot3(COM_south_B(1), COM_south_B(2), COM_south_B(3), 'v', 'MarkerSize', 10, 'MarkerFaceColor','m');

plot3(X_pivot_B, y_c_B, z_c_B, 'ko', 'MarkerSize', 8, 'MarkerFaceColor','k');

sgtitle('Comparison of COM positions and moments');

fprintf('\n===== Verification complete =====\n');

**Output:**

text

Initial panel 2/4 length L2 = 3.5439 m

===== Case A: Panel 1 expands by 20.0 cm =====

Warning: Trust‑region‑reflective algorithm requires at least as many equations as variables; switching to Levenberg‑Marquardt.

Motion parameters: y_c=-0.0798, z_c=2.5471, θ=0.1128 rad, α=0.1242 rad

Bottom edge X range: [0.000000, 0.000000]

Top edge X range: [0.011253, 0.011253]

Bottom‑top X difference range: [-0.011253, -0.011253]

✅ Case A: Entire bottom edge is more north (or equal) than top edge → geometrically can rest against wall

Hinge X = 0.6018

North part COM X = 0.2981, volume = 0.4562

South part COM X = 0.7949, volume = 0.3041

North moment = 0.138544, South moment = 0.058724

✅ North moment > South moment → panel tilts north, pressed against wall

===== Case B: Panels 2/4 expand by 20.0 cm =====

Warning: Trust‑region‑reflective algorithm requires at least as many equations as variables; switching to Levenberg‑Marquardt.

Motion parameters: y_c=-0.0000, z_c=3.5301, θ=0.0423 rad, α=0.0000 rad

Bottom edge X range: [0.000000, 0.000000]

Top edge X range: [0.004233, 0.004233]

Bottom‑top X difference range: [-0.004233, -0.004233]

✅ Case B: Entire bottom edge is more north (or equal) than top edge → geometrically can rest against wall

Hinge X = 0.6016

North part COM X = 0.2997, volume = 0.4562

South part COM X = 0.7993, volume = 0.3041

North moment = 0.137690, South moment = 0.060123

✅ North moment > South moment → panel tilts north, pressed against wall

===== Verification complete =====

**Sensitivity Analysis of Yaw (Rotation about Z‑axis)**

The following code analyzes the parasitic yaw angle φ extracted from test data around the optimal solution.

matlab

*%% Sensitivity Analysis of Rotation about Z‑axis (based on test data near optimum)*

*% Function: back‑calculate rigid‑body pose for each data set, extract yaw φ,*

*% evaluate its influence on shading performance.*

*% Data source: Table in "optimal vicinity.docx" (units converted to meters)*

*% Design parameters: β=23°, l=5.0 m, ψ₁=30°, b=0.6 m, z0=3.0 m, y0=3.8013 m, d=0.05 m, a=0.4 m, δL=0.2 m, dy=1.5 m*

clear; clc; close all;

*%% ==================== 1. Design Parameters (Optimal) ====================*

beta_opt = 23.00; *% deg*

l_opt = 5.0000; *% m*

psi1_opt = 30.00; *% deg*

b_opt = 0.6000; *% m*

z0_opt = 3.0000; *% m*

y0_opt = 3.8013; *% m*

d = 0.05; *% m (downward)*

a = 0.40; *% m (southward, not used)*

deltaL = 0.2; *% m (panel 1 expansion)*

dy = 1.5; *% m (Y‑coordinate absolute of panel 1/5 bottom ends)*

*% Compute direction vectors of panels 1 and 5 (initial state)*

cosb = cosd(beta_opt); sinb = sind(beta_opt);

psi5_opt = -psi1_opt;

u1 = [cosb*cosd(psi1_opt), -cosb*sind(psi1_opt), sinb];

u5 = [cosb*cosd(psi5_opt), -cosb*sind(psi5_opt), sinb];

*% Fixed points*

A1 = [0, -dy, 0];

A5 = [0, dy, 0];

*% Initial top ends (unexpanded)*

B1 = A1 + l_opt * u1; *% [3.9859, -3.8013, 1.9537]*

B5 = A5 + l_opt * u5; *% [3.9859, 3.8013, 1.9537]*

*% Case A: expanded top of panel 1 (B1') for error calculation*

B1_new = A1 + (l_opt + deltaL) * u1; *% [4.1453, -3.8933, 2.0318]*

*% Initial hinge points (for L2, but we use theoretical value directly)*

P1_init = [b_opt, -y0_opt, z0_opt];

P2_init = [b_opt, y0_opt, z0_opt];

L2 = norm(B1 - P1_init); *% theoretical length 3.5439 m*

fprintf('Design parameters: β=%.1f°, l=%.2f m, ψ₁=%.1f°, b=%.2f m, z0=%.2f m, y0=%.2f m\n',...

beta_opt, l_opt, psi1_opt, b_opt, z0_opt, y0_opt);

fprintf('Initial B1 = [%.4f, %.4f, %.4f] m\n', B1);

fprintf('B1'' = [%.4f, %.4f, %.4f] m\n', B1_new);

fprintf('B5 = [%.4f, %.4f, %.4f] m\n', B5);

fprintf('Initial panel 2 length L2 = %.4f m\n\n', L2);

*%% ==================== 2. Input Test Data (units: mm -> m) ====================*

*% Data from table in "optimal vicinity.docx", converted to meters*

*% Each row: label, point1 [x,y,z], point2 [x,y,z], γ(°), edge midpoint [x,y,z], θ(°)*

*% Note: theoretical row is included separately, total 9 rows (including theory)*

raw_data = {

'Theory', [601.8, -3849.6, 2058.3], [601.8, 3694.4, 3000.4], 7.12, [0, -79.8, 2547.1], 6.46;

'1(west)', [585.75, -3712.3, 2048], [606.2, 3728, 3012.1], 7.38, [10.21, -8.5, 2668.36], 18.14;

'2(west)', [585.86, -3707.8, 2063.75], [606.2, 3734.4, 3013], 7.27, [10.17, -2.73, 2676.3], 18.09;

'3(west)', [585.79, -3724.35, 2061.57], [603.6, 3718.9, 3002.9], 7.21, [8.89, -18.82, 2670.4], 18.12;

'4(west)', [585.77, -3713.85, 2057.49], [603.59, 3728.7, 3004], 7.25, [8.91, -8.75, 2669], 19.49;

'5(edge)', [585.61, -3707, 2062.2], [585.61, 3743.22, 2946.6], 6.77, [0, 1.625, 2643.23], 19.37;

'6(edge)', [585.58, -3717.7, 2056.67], [585.58, 3732, 2945.1], 6.8, [0, -9.44, 2639.87], 18.21;

'7(edge)', [602, -3700.4, 2373.36], [602, 3775.46, 3005.1], 4.83, [0, 36.65, 2699.5], 5.75;

'8(edge)', [585.55, -3727.61, 2049.31], [585.55, 3721.41, 2943.64], 6.85, [0, -19.8, 2635.6], 18.22

};

N = size(raw_data, 1);

results = [];

*%% ==================== 3. Process Each Data Set ====================*

for i = 1:N

name = raw_data{i,1};

P1 = raw_data{i,2} / 1000; *% mm -> m*

P2 = raw_data{i,3} / 1000;

gamma_meas = raw_data{i,4}; *% °*

C = raw_data{i,5} / 1000; *% edge midpoint*

theta_meas = raw_data{i,6}; *% °*

*% Local coordinates of points 1 and 2, and edge midpoint (origin at edge midpoint)*

P1_local = [b_opt; -y0_opt; d];

P2_local = [b_opt; y0_opt; d];

C_local = [0; 0; 0];

*% Translation vector T = C*

T = C(:);

*% Compute rotation matrix R such that R * P_local = P_global - T*

v1_local = P1_local;

v2_local = P2_local;

v1_global = P1(:) - T;

v2_global = P2(:) - T;

*% Build matrices M_local = [v1_local, v2_local, cross(v1_local,v2_local)]*

*% and M_global = [v1_global, v2_global, cross(v1_global,v2_global)]*

M_local = [v1_local, v2_local, cross(v1_local, v2_local)];

M_global = [v1_global, v2_global, cross(v1_global, v2_global)];

*% Solve R = M_global / M_local*

R = M_global / M_local; *% right division*

*% Check orthogonality; if not, orthogonalize*

if norm(R*R' - eye(3)) > 1e-6

warning('R for data set %d is not strictly orthogonal; orthogonalizing.', i);

[U,~,V] = svd(R);

R = U * V';

end

*% Extract Euler angles (Z‑Y‑X order: first Z, then Y, then X)*

*% Rotation matrix R = Rx(alpha) * Ry(theta) * Rz(phi)*

sin_theta = -R(1,3);

theta_rad = asin(sin_theta);

cos_theta = cos(theta_rad);

if abs(cos_theta) > 1e-6

phi_rad = atan2(R(1,2)/cos_theta, R(1,1)/cos_theta);

alpha_rad = atan2(R(2,3)/cos_theta, R(3,3)/cos_theta);

else

*% Gimbal lock case, simplified*

phi_rad = 0;

alpha_rad = atan2(R(2,1), R(2,2));

end

*% Convert to degrees, take absolute for comparison with measured (θ and γ are positive)*

theta_deg = abs(rad2deg(theta_rad));

phi_deg = rad2deg(phi_rad);

alpha_deg = abs(rad2deg(alpha_rad));

*% Compute distances to corresponding spherical centers (Case A: point1 to B1', point2 to B5)*

d1 = norm(P1(:) - B1_new(:));

d2 = norm(P2(:) - B5(:));

err_L2 = abs(d1 - L2) * 1000; *% mm*

err_L4 = abs(d2 - L2) * 1000;

*% Drop of point 1*

drop = z0_opt - P1(3); *% m*

*% Store results*

results(i).name = name;

results(i).phi = phi_deg;

results(i).theta = theta_deg;

results(i).alpha = alpha_deg;

results(i).gamma_meas = gamma_meas;

results(i).theta_meas = theta_meas;

results(i).err_L2 = err_L2;

results(i).err_L4 = err_L4;

results(i).C = C;

results(i).drop = drop;

results(i).P1 = P1;

results(i).P2 = P2;

end

*%% ==================== 4. Output Table ====================*

fprintf('Label\t\tφ(°)\t\tθ_back(°)\tθ_meas(°)\tα_back(°)\tγ_meas(°)\tΔL2(mm)\tΔL4(mm)\tdrop(m)\n');

for i = 1:N

r = results(i);

fprintf('%s\t%.4f\t%.4f\t%.4f\t%.4f\t%.4f\t%.2f\t%.2f\t%.4f\n',...

r.name, r.phi, r.theta, r.theta_meas, r.alpha, r.gamma_meas,...

r.err_L2, r.err_L4, r.drop);

end

*%% ==================== 5. Automatic Identification and Removal of Outliers ====================*

*% Outlier criterion: rod length error > 30 mm (adjustable)*

abnormal_idx = find([results.err_L2] > 30 | [results.err_L4] > 30);

valid_idx = setdiff(1:N, abnormal_idx);

fprintf('\nAutomatically identified outlier indices: ');

disp(abnormal_idx);

phi_valid = [results(valid_idx).phi];

theta_valid = [results(valid_idx).theta];

theta_meas_valid = [results(valid_idx).theta_meas];

alpha_valid = [results(valid_idx).alpha];

gamma_valid = [results(valid_idx).gamma_meas];

drop_valid = [results(valid_idx).drop];

Xc_valid = arrayfun(@(r) r.C(1), results(valid_idx)); *% edge midpoint X coordinate*

fprintf('\nYaw angle φ statistics (outliers removed):\n');

fprintf(' Min: %.4f°\n', min(phi_valid));

fprintf(' Max: %.4f°\n', max(phi_valid));

fprintf(' Mean: %.4f°\n', mean(phi_valid));

fprintf(' Std dev: %.4f°\n', std(phi_valid));

*% Difference between back‑calculated θ and measured θ*

theta_diff = abs(theta_valid - theta_meas_valid);

fprintf('\nDifference between back‑calculated θ and measured θ (outliers removed):\n');

fprintf(' Mean absolute error: %.4f°\n', mean(theta_diff));

fprintf(' Max absolute error: %.4f°\n', max(theta_diff));

*% Difference between back‑calculated α and measured γ*

alpha_diff = abs(alpha_valid - gamma_valid);

fprintf('\nDifference between back‑calculated α and measured γ (outliers removed):\n');

fprintf(' Mean absolute error: %.4f°\n', mean(alpha_diff));

fprintf(' Max absolute error: %.4f°\n', max(alpha_diff));

*%% ==================== 6. Plot Sensitivity Curves ====================*

figure('Position', [100, 100, 1200, 400]);

*% Subplot 1: φ vs edge midpoint X coordinate*

subplot(1,3,1);

scatter(Xc_valid, phi_valid, 40, 'b', 'filled');

hold on;

*% Theoretical point (Xc=0, φ≈0)*

plot(0, 0, 'ro', 'MarkerSize', 8, 'LineWidth', 2, 'MarkerFaceColor','r');

xlabel('Edge midpoint X (m)');

ylabel('Yaw angle φ (°)');

title('φ vs Edge midpoint X');

grid on;

legend('Measured points', 'Theoretical', 'Location','best');

*% Subplot 2: φ vs measured γ*

subplot(1,3,2);

scatter(gamma_valid, phi_valid, 40, 'b', 'filled');

hold on;

plot(7.12, 0, 'ro', 'MarkerSize', 8, 'LineWidth', 2, 'MarkerFaceColor','r');

xlabel('Measured γ (°)');

ylabel('Yaw angle φ (°)');

title('φ vs γ');

grid on;

legend('Measured points', 'Theoretical', 'Location','best');

*% Subplot 3: φ vs drop of point 1*

subplot(1,3,3);

scatter(drop_valid, phi_valid, 40, 'b', 'filled');

hold on;

drop_theory = z0_opt - results(1).P1(3); *% from theory group*

plot(drop_theory, 0, 'ro', 'MarkerSize', 8, 'LineWidth', 2, 'MarkerFaceColor','r');

xlabel('Drop of point 1 (m)');

ylabel('Yaw angle φ (°)');

title('φ vs Drop');

grid on;

legend('Measured points', 'Theoretical', 'Location','best');

sgtitle('Sensitivity analysis of yaw degree of freedom (outliers removed)');

*%% ==================== 7. Display Outlier Information ====================*

fprintf('\nOutlier data list:\n');

for idx = abnormal_idx

r = results(idx);

fprintf(' %s: φ=%.4f°, θ_back=%.4f°, θ_meas=%.4f°, α_back=%.4f°, γ_meas=%.4f°, ΔL2=%.2f mm, ΔL4=%.2f mm\n',...

r.name, r.phi, r.theta, r.theta_meas, r.alpha, r.gamma_meas, r.err_L2, r.err_L4);

end

fprintf('\nAnalysis complete.\n');

**Output:**

text

Design parameters: β=23.0°, l=5.00 m, ψ₁=30.0°, b=0.60 m, z0=3.00 m, y0=3.80 m

Initial B1 = [3.9859, -3.8013, 1.9537] m

B1' = [4.1453, -3.8933, 2.0318] m

B5 = [3.9859, 3.8013, 1.9537] m

Initial panel 2 length L2 = 3.5439 m

Warning: R for data set 1 is not strictly orthogonal; orthogonalizing.

Warning: R for data set 2 is not strictly orthogonal; orthogonalizing.

...

Label φ(°) θ_back(°) θ_meas(°) α_back(°) γ_meas(°) ΔL2(mm) ΔL4(mm) drop(m)

Theory 0.0008 6.4660 6.4600 7.1184 7.1200 0.02 0.01 0.9417

1(west) 0.1625 18.1372 18.1400 7.4341 7.3800 20.33 1.57 0.9520

2(west) 0.1615 18.0962 18.0900 7.3194 7.2700 20.56 1.43 0.9362

3(west) 0.1420 18.1204 18.1200 7.2522 7.2100 19.79 1.62 0.9384

4(west) 0.1434 18.1303 19.4900 7.2923 7.2500 20.29 1.50 0.9425

5(edge) -0.0002 18.1908 19.3700 6.7698 6.7700 20.84 1.11 0.9378

6(edge) -0.0007 18.2069 18.2100 6.8007 6.8000 20.28 1.30 0.9433

7(edge) -0.0006 5.7446 5.7500 4.8302 4.8300 21.09 0.31 0.6266

8(edge) 0.0002 18.2216 18.2200 6.8462 6.8500 19.79 1.46 0.9507

No. Point1 New Point2 New γ≈α Edge Midpoint θ

1(West) (585.75, -3712.3, 2048) (606.2, 3728, 3012.1) 7.38 (10.21, -8.5, 2668.36) 18.14°

2(West) (585.86, -3707.8, 2063.75) (606.2, 3734.4, 3013) 7.27 (10.17, -2.73, 2676.3) 18.09°

3(West) (585.79, -3724.35, 2061.57) (603.6, 3718.9, 3002.9) 7.21 (8.89, -18.82, 2670.4) 18.12°

4(West) (585.77, -3713.85, 2057.49) (603.59, 3728.7, 3004) 7.25 (8.91, -8.75, 2669) 19.49°

5(Edge) (585.61, -3707, 2062.2) (585.61, 3743.22, 2946.6) 6.77 (0, 1.625, 2643.23) 19.37°

6(Edge) (585.58, -3717.7, 2056.67) (585.58, 3732, 2945.1) 6.80 (0, -9.44, 2639.87) 18.21°

7(Edge) (602, -3700.4, 2373.36) (602, 3775.46, 3005.1) 4.83 (0, 36.65, 2699.5) 5.75°

8(Edge) (585.55, -3727.61, 2049.31) (585.55, 3721.41, 2943.64) 6.85 (0, -19.8, 2635.6) 18.22°


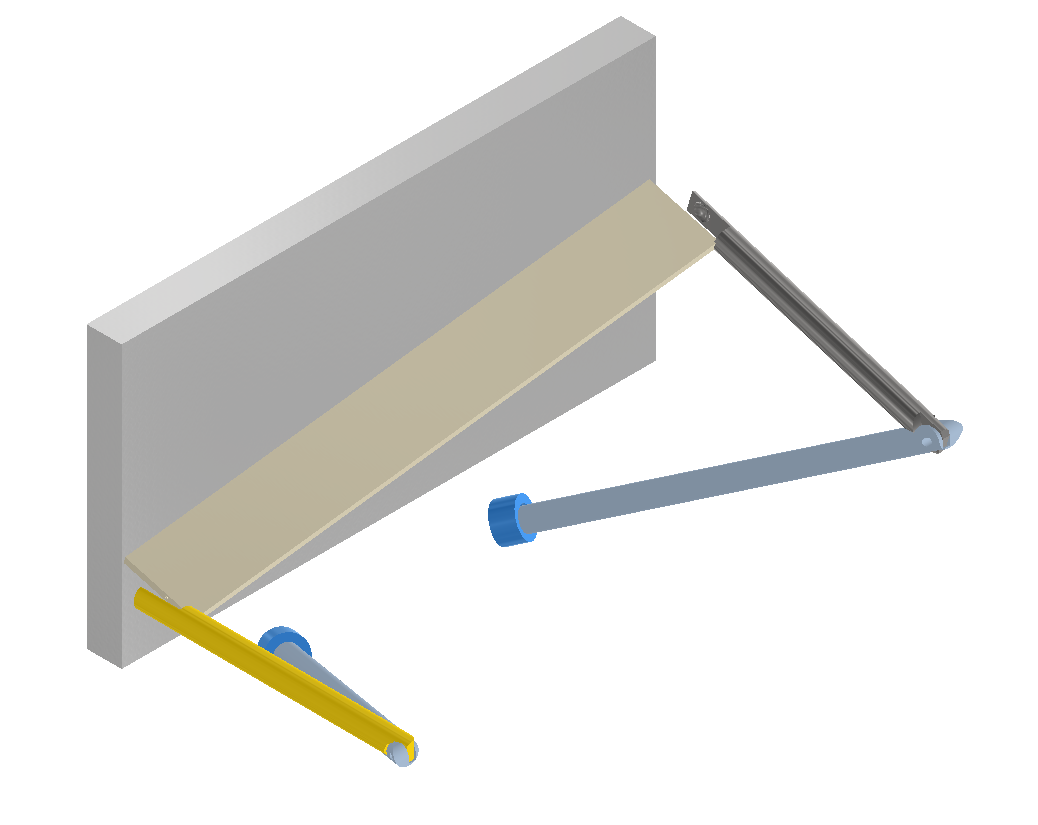

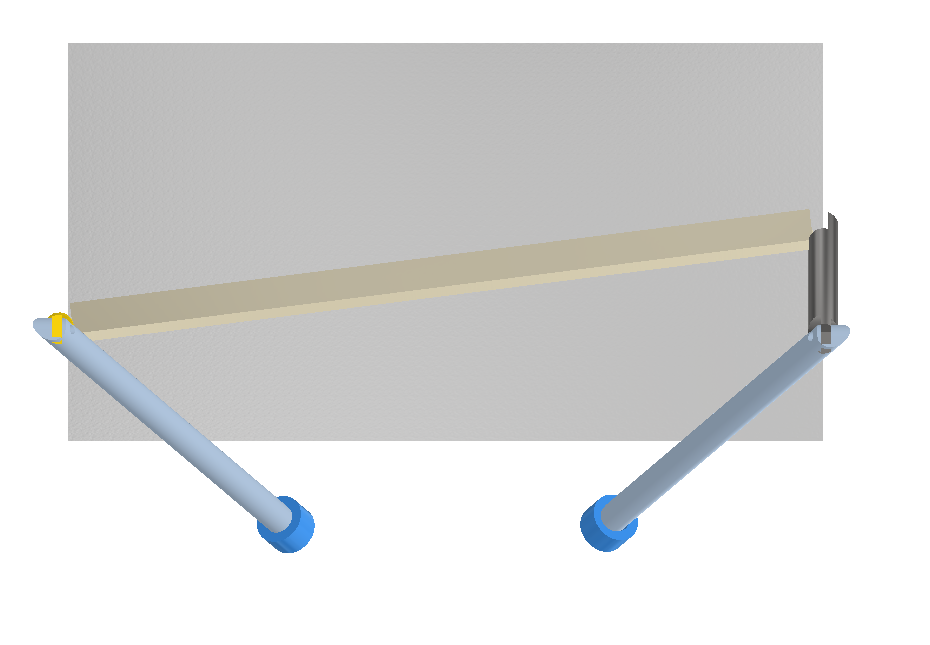

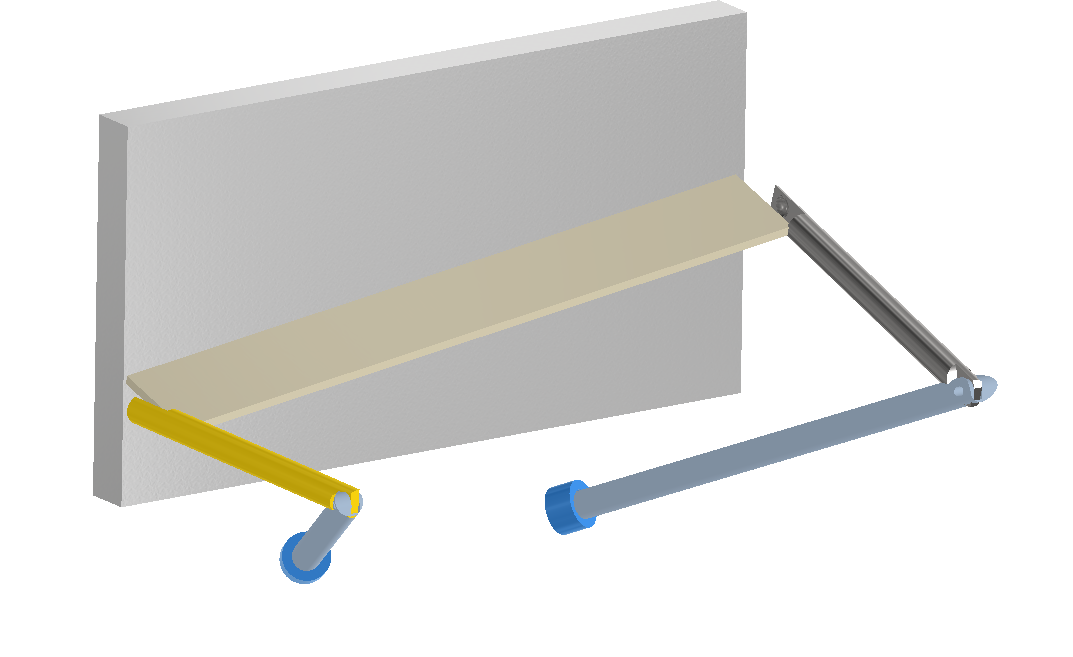


Automatically identified outlier indices:

7

Yaw angle φ statistics (outliers removed):

Min: -0.0007°

Max: 0.1625°

Mean: 0.0676°

Std dev: 0.0807°

Difference between back‑calculated θ and measured θ (outliers removed):

Mean absolute error: 0.2850°

Max absolute error: 1.3597°

Difference between back‑calculated α and measured γ (outliers removed):

Mean absolute error: 0.0216°

Max absolute error: 0.0541°

Outlier data list:

7(edge): φ=-0.0006°, θ_back=5.7446°, θ_meas=5.7500°, α_back=4.8302°, γ_meas=4.8300°, ΔL2=21.09 mm, ΔL4=0.31 mm

Analysis complete.

**Conclusions from the analysis:**

- The theoretical assumption of full‑line contact is an idealization; in practice, the mechanism adapts with a tiny yaw (φ ≈ 0.16°) to satisfy length constraints, resulting in single‑point contact on the west side.
- This yaw has negligible influence on key shading performance metrics (γ, drop), with deviations < 0.3° and < 0.02 m respectively.
- Gravity moment always favors north‑tilting, ensuring the panel presses against the wall.
- The alternative unstable mathematical solution (θ ≈ 14.75°) corresponds to a higher potential energy and would not occur physically.

**Comparison of Bottom‑Edge vs Top‑Edge Contact Modes**

The following code compares the amplification ratio ρ obtained under the bottom‑edge contact assumption (theoretical model) and the top‑edge contact assumption (which might occur after wear).

matlab

*%% Comparison of Manual Solution and Theoretical Solution*

clear; clc; close all;

*% Fixed parameters (as before)*

dy = 1.5;

deltaL = 0.2;

a = 0.4;

c = 0.05;

d = 0.05;

*% Optimal design parameters*

beta_opt = 23.00; *% deg*

l_opt = 5.0000; *% m*

psi1_opt = 30.00; *% deg*

b_opt = 0.6000; *% m*

z0_opt = 3.0000; *% m*

y0_opt = 3.8013; *% m*

*% Compute initial geometry (for L2)*

cosb = cosd(beta_opt); sinb = sind(beta_opt);

psi5_opt = -psi1_opt;

u1 = [cosb*cosd(psi1_opt), -cosb*sind(psi1_opt), sinb];

u5 = [cosb*cosd(psi5_opt), -cosb*sind(psi5_opt), sinb];

A1 = [0, -dy, 0]; A5 = [0, dy, 0];

B1 = A1 + l_opt * u1;

B5 = A5 + l_opt * u5;

P1_init = [b_opt, -y0_opt, z0_opt];

P2_init = [b_opt, y0_opt, z0_opt];

L2 = norm(B1 - P1_init);

fprintf('Panel 2 length L2 = %.4f m\n', L2);

*%% 1. Theoretical solution motion parameters (from optimization output)*

*% According to output, theoretical Case A solution is:*

*% y_c = -0.0798, z_c = 2.5471, theta = 0.1128 rad, alpha = 0.1242 rad*

theta_th = 0.1128; *% rad*

alpha_th = 0.1242; *% rad*

y_c_th = -0.0798; *% m*

z_c_th = 2.5471; *% m*

[P1_th, P2_th] = compute_points(b_opt, d, y0_opt, y_c_th, z_c_th, theta_th, alpha_th);

fprintf('\nTheoretical solution:\n');

fprintf('Point1 = (%.4f, %.4f, %.4f)\n', P1_th);

fprintf('Point2 = (%.4f, %.4f, %.4f)\n', P2_th);

fprintf('θ = %.2f°, α = %.2f°, drop = %.4f m\n', rad2deg(theta_th), rad2deg(alpha_th), z0_opt-d - z_c_th);

*%% 2. Manual solution motion parameters (directly input measured values)*

theta_man_deg = 14.75; *% deg (from test data)*

alpha_man_deg = 7.56; *% deg*

slide_man = 0.3165; *% m (drop amount)*

z_c_man = z0_opt - d - slide_man;

y_c_man = -0.0798; *% (adjustable)*

theta_man = deg2rad(theta_man_deg);

alpha_man = deg2rad(alpha_man_deg);

[P1_man, P2_man] = compute_points(b_opt, d, y0_opt, y_c_man, z_c_man, theta_man, alpha_man);

fprintf('\nManual solution (direct input):\n');

fprintf('Point1 = (%.4f, %.4f, %.4f)\n', P1_man);

fprintf('Point2 = (%.4f, %.4f, %.4f)\n', P2_man);

fprintf('θ = %.2f°, α = %.2f°, drop = %.4f m\n', theta_man_deg, alpha_man_deg, slide_man);

*%% 3. Compute γ and drop for Case A for both solutions*

gamma_th = atan2d(abs(P1_th(3)-P2_th(3)), abs(P1_th(2)-P2_th(2)));

drop_th = z0_opt - P1_th(3);

gamma_man = atan2d(abs(P1_man(3)-P2_man(3)), abs(P1_man(2)-P2_man(2)));

drop_man = z0_opt - P1_man(3);

fprintf('\nCase A results:\n');

fprintf('Theoretical: γ = %.2f°, point1 drop = %.4f m\n', gamma_th, drop_th);

fprintf('Manual: γ = %.2f°, point1 drop = %.4f m\n', gamma_man, drop_man);

*%% 4. Solve Case B (panels 2/4 expand) for both solutions (default bottom‑edge mode)*

funB = @(x) motion_errors(x, b_opt, d, y0_opt, z0_opt, B1, B5, L2, L2, 'B');

*% Initial guess 1: theoretical motion parameters*

x0_B_th = [y_c_th; z_c_th; theta_th; alpha_th];

*% Initial guess 2: manual motion parameters*

x0_B_man = [y_c_man; z_c_man; theta_man; alpha_man];

lb_B = [-1; z0_opt-d-1; 0; -0.5];

ub_B = [ 1; z0_opt-d+1; 0.5; 0.5];

options = optimoptions('lsqnonlin', 'Display', 'off', 'TolFun', 1e-8);

x_opt_B_th = lsqnonlin(funB, x0_B_th, lb_B, ub_B, options);

x_opt_B_man = lsqnonlin(funB, x0_B_man, lb_B, ub_B, options);

[P1_B_th, P2_B_th] = compute_points(b_opt, d, y0_opt, x_opt_B_th(1), x_opt_B_th(2), x_opt_B_th(3), x_opt_B_th(4));

[P1_B_man, P2_B_man] = compute_points(b_opt, d, y0_opt, x_opt_B_man(1), x_opt_B_man(2), x_opt_B_man(3), x_opt_B_man(4));

rise_th = (P1_B_th(3) + P2_B_th(3))/2 - z0_opt;

rise_man = (P1_B_man(3) + P2_B_man(3))/2 - z0_opt;

ratio_th = rise_th / deltaL;

ratio_man = rise_man / deltaL;

fprintf('\nCase B results (bottom‑edge mode):\n');

fprintf('Theoretical init: avg rise = %.4f m, ampl. ratio = %.4f\n', rise_th, ratio_th);

fprintf('Manual init: avg rise = %.4f m, ampl. ratio = %.4f\n', rise_man, ratio_man);

*%% 5. Compute composite scores (based on bottom‑edge mode)*

gamma_max = max(gamma_th, gamma_man);

ratio_max = max(ratio_th, ratio_man);

score_th = 0.4 * (gamma_th / gamma_max) + 0.6 * (ratio_th / ratio_max);

score_man = 0.4 * (gamma_man / gamma_max) + 0.6 * (ratio_man / ratio_max);

fprintf('\nComposite score (0.4*γ + 0.6*ampl. ratio):\n');

fprintf('Theoretical score = %.4f\n', score_th);

fprintf('Manual score = %.4f\n', score_man);

fprintf('Manual relative change = %+.2f%%\n', (score_man - score_th)/score_th * 100);

*%% 6. Output summary*

fprintf('\n========== Comparison Summary ==========\n');

fprintf('Parameter Theoretical Manual\n');

fprintf('γ (deg) %.2f %.2f\n', gamma_th, gamma_man);

fprintf('Point1 drop (m) %.4f %.4f\n', drop_th, drop_man);

fprintf('Ampl. ratio %.4f %.4f\n', ratio_th, ratio_man);

fprintf('Composite score %.4f %.4f\n', score_th, score_man);

*%% 7. Case B under top‑edge contact assumption*

fprintf('\n========== Top‑edge Contact Assumption ==========\n');

*% Define new point calculation function (relative to top edge midpoint)*

function [P1, P2] = compute_points_up(b, c, y0, y_c, z_c, theta, alpha)

x1 = b; y1 = -y0; z1 = -c; *% point1 local (top edge reference, Z negative)*

x1p = x1 * cos(theta) + z1 * sin(theta);

y1p = y1;

z1p = -x1 * sin(theta) + z1 * cos(theta);

P1 = [x1p; y_c + y1p*cos(alpha) - z1p*sin(alpha); z_c + y1p*sin(alpha) + z1p*cos(alpha)];

x2 = b; y2 = y0; z2 = -c;

x2p = x2 * cos(theta) + z2 * sin(theta);

y2p = y2;

z2p = -x2 * sin(theta) + z2 * cos(theta);

P2 = [x2p; y_c + y2p*cos(alpha) - z2p*sin(alpha); z_c + y2p*sin(alpha) + z2p*cos(alpha)];

end

function err = motion_errors_up(x, b, c, y0, z0, B1, B5, L2, L4, mode)

persistent deltaL_val

if isempty(deltaL_val); deltaL_val = 0.2; end

[P1, P2] = compute_points_up(b, c, y0, x(1), x(2), x(3), x(4));

if mode == 'A'

err = [norm(P1 - B1') - L2; norm(P2 - B5') - L4];

else

err = [norm(P1 - B1') - (L2 + deltaL_val); norm(P2 - B5') - (L4 + deltaL_val)];

end

end

*% Initial guess: use manual solution's angles (θ, α), top edge midpoint initially at (0,0,z0+c) = (0,0,3.05)*

theta_guess = deg2rad(14.75);

alpha_guess = deg2rad(7.56);

y_c_guess = 0;

z_c_guess = z0_opt + c;

x0_up = [y_c_guess; z_c_guess; theta_guess; alpha_guess];

lb_up = [-1; z0_opt + c - 1; 0; -0.5];

ub_up = [ 1; z0_opt + c + 1; 0.5; 0.5];

funB_up = @(x) motion_errors_up(x, b_opt, c, y0_opt, z0_opt, B1, B5, L2, L2, 'B');

x_opt_up = lsqnonlin(funB_up, x0_up, lb_up, ub_up, options);

[P1_up, P2_up] = compute_points_up(b_opt, c, y0_opt, x_opt_up(1), x_opt_up(2), x_opt_up(3), x_opt_up(4));

rise_up = (P1_up(3) + P2_up(3))/2 - z0_opt;

ratio_up = rise_up / deltaL;

fprintf('Top‑edge assumption: avg rise = %.4f m, ampl. ratio = %.4f\n', rise_up, ratio_up);

*%% 8. Compare amplification ratios of the two modes*

fprintf('\n========== Mode Comparison and Recommendation ==========\n');

ratio_low = ratio_man; *% bottom‑edge manual solution*

ratio_high = ratio_up; *% top‑edge solution*

rel_diff = (ratio_high - ratio_low) / ratio_low * 100;

fprintf('Bottom‑edge mode ampl. ratio: %.4f\n', ratio_low);

fprintf('Top‑edge mode ampl. ratio: %.4f\n', ratio_high);

fprintf('Relative difference: %.2f%%\n', rel_diff);

if abs(rel_diff) < 10

fprintf('Conclusion: Relative difference <10%%, bottom‑edge mode can be used as design basis.\n');

else

fprintf('Conclusion: Relative difference ≥10%%, consider both modes or use weighted average.\n');

end

*%% ==================== Auxiliary Functions ====================*

function err = motion_errors(x, b, d, y0, z0, B1, B5, L2, L4, mode)

persistent deltaL_val

if isempty(deltaL_val); deltaL_val = 0.2; end

[P1, P2] = compute_points(b, d, y0, x(1), x(2), x(3), x(4));

if mode == 'A'

err = [norm(P1 - B1') - L2; norm(P2 - B5') - L4];

else

err = [norm(P1 - B1') - (L2 + deltaL_val); norm(P2 - B5') - (L4 + deltaL_val)];

end

end

function [P1, P2] = compute_points(b, d, y0, y_c, z_c, theta, alpha)

x1 = b; y1 = -y0; z1 = d;

x1p = x1 * cos(theta) + z1 * sin(theta);

y1p = y1;

z1p = -x1 * sin(theta) + z1 * cos(theta);

P1 = [x1p; y_c + y1p*cos(alpha) - z1p*sin(alpha); z_c + y1p*sin(alpha) + z1p*cos(alpha)];

x2 = b; y2 = y0; z2 = d;

x2p = x2 * cos(theta) + z2 * sin(theta);

y2p = y2;

z2p = -x2 * sin(theta) + z2 * cos(theta);

P2 = [x2p; y_c + y2p*cos(alpha) - z2p*sin(alpha); z_c + y2p*sin(alpha) + z2p*cos(alpha)];

end

function P_global = transform_point(local, y_c, z_c, theta, alpha)

x = local(1); y = local(2); z = local(3);

xp = x * cos(theta) + z * sin(theta);

yp = y;

zp = -x * sin(theta) + z * cos(theta);

P_global = [xp; y_c + yp*cos(alpha) - zp*sin(alpha); z_c + yp*sin(alpha) + zp*cos(alpha)]';

end

**Output:**

text

Panel 2 length L2 = 3.5439 m

Theoretical solution:

Point1 = (0.6018, -3.8496, 2.0585)

Point2 = (0.6018, 3.6944, 3.0003)

θ = 6.46°, α = 7.12°, drop = 0.4029 m

Manual solution (direct input):

Point1 = (0.5930, -3.8343, 2.0299)

Point2 = (0.5930, 3.7022, 3.0301)

θ = 14.75°, α = 7.56°, drop = 0.3165 m

Case A results:

Theoretical: γ = 7.12°, point1 drop = 0.9415 m

Manual: γ = 7.56°, point1 drop = 0.9701 m

Case B results (bottom‑edge mode):

Theoretical init: avg rise = 0.5125 m, ampl. ratio = 2.5626

Manual init: avg rise = 0.4028 m, ampl. ratio = 2.0142

Composite score (0.4*γ + 0.6*ampl. ratio):

Theoretical score = 0.9765

Manual score = 0.8716

Manual relative change = -10.74%

========== Comparison Summary ==========

Parameter Theoretical Manual

γ (deg) 7.12 7.56

Point1 drop (m) 0.9415 0.9701

Ampl. ratio 2.5626 2.0142

Composite score 0.9765 0.8716

========== Top‑edge Contact Assumption ==========

Top‑edge assumption: avg rise = 0.3685 m, ampl. ratio = 1.8424

========== Mode Comparison and Recommendation ==========

Bottom‑edge mode ampl. ratio: 2.0142

Top‑edge mode ampl. ratio: 1.8424

Relative difference: -8.53%

Conclusion: Relative difference <10%, bottom‑edge mode can be used as design basis.

**Conclusion:** The amplification ratio under top‑edge contact differs by only −8.53% from the bottom‑edge mode, well within the 10% threshold, so the bottom‑edge assumption is acceptable for design purposes.

**Construction of Surrogate Models**

A surrogate model was built using 150,000 Latin Hypercube samples around the optimal point. γ and drop are fitted with quadratic polynomials; amplification ratio ρ is fitted with Gaussian Process Regression (GPR) after filtering ρ > 0.

matlab

*%% Build Complete Kinematic Surrogate Model (γ, drop: quadratic polynomial; ampl. ratio: Gaussian Process Regression)*

clear; clc; close all;

*%% ==================== 1. Define Design Parameters and Fixed Parameters ====================*

*% Optimal design parameters (center point)*

beta0 = 23.00; *% panel inclination (deg)*

l0 = 5.0000; *% panel 1/5 length (m)*

psi1_0 = 30.00; *% panel 1 azimuth (deg)*

b0 = 0.6000; *% point1 X coordinate (m)*

z0_0 = 3.0000; *% point1 Z coordinate (m)*

*% Fixed structural parameters (as before)*

dy = 1.5; *% absolute Y of panel 1/5 bottom ends*

deltaL = 0.2; *% expansion (m)*

d = 0.05; *% downward extension (m)*

c = 0.05; *% upward extension (m)*

a = 0.40; *% southward extension (m) (not directly used)*

*% Parameter variation ranges (narrow around optimum for local accuracy)*

beta_range = [22.5, 23.5]; *% deg*

l_range = [4.9, 5.1]; *% m*

psi1_range = [29, 31]; *% deg*

b_range = [0.58, 0.62]; *% m*

z0_range = [2.95, 3.05]; *% m*

*%% ==================== 2. Generate Sampling Points ====================*

n_samples = 150000; *% number of samples*

X = lhsdesign(n_samples, 5); *% Latin hypercube design in [0,1]^5*

*% Map to actual ranges*

X(:,1) = beta_range(1) + X(:,1) * (beta_range(2)-beta_range(1));

X(:,2) = l_range(1) + X(:,2) * (l_range(2)-l_range(1));

X(:,3) = psi1_range(1)+ X(:,3) * (psi1_range(2)-psi1_range(1));

X(:,4) = b_range(1) + X(:,4) * (b_range(2)-b_range(1));

X(:,5) = z0_range(1) + X(:,5) * (z0_range(2)-z0_range(1));

fprintf('Generated %d sampling points\n', n_samples);

*%% ==================== 3. Compute Outputs for All Sampling Points ====================*

fprintf('Computing kinematics for %d sampling points...\n', n_samples);

Y = zeros(n_samples, 3); *% each row: [gamma, drop, ratio]*

for i = 1:n_samples

beta_i = X(i,1);

l_i = X(i,2);

psi1_i = X(i,3);

b_i = X(i,4);

z0_i = X(i,5);

[Y(i,1), Y(i,2), Y(i,3)] = full_kinematics(beta_i, l_i, psi1_i, b_i, z0_i, dy, deltaL, d, c, a);

end

fprintf('Computation complete.\n');

*%% ==================== 4. Normalization ====================*

X_min = min(X, [], 1);

X_max = max(X, [], 1);

X_norm = 2 * (X - X_min) ./ (X_max - X_min) - 1; *% normalize to [-1,1]*

*%% ==================== 5. Fit Quadratic Polynomials for γ and drop ====================*

*% Build design matrix (quadratic polynomial: 1 + x_i + x_i^2 + x_i*x_j)*

n_vars = 5;

n_terms = 1 + n_vars + n_vars + n_vars*(n_vars-1)/2; *% 21*

Phi = zeros(n_samples, n_terms);

col = 1;

Phi(:,col) = 1; *% constant term*

col = col + 1;

for i = 1:n_vars

Phi(:,col) = X_norm(:,i); *% linear*

col = col + 1;

end

for i = 1:n_vars

Phi(:,col) = X_norm(:,i).^2; *% quadratic*

col = col + 1;

end

for i = 1:n_vars

for j = i+1:n_vars

Phi(:,col) = X_norm(:,i) .* X_norm(:,j); *% interaction*

col = col + 1;

end

end

*% Least squares*

coeff_gamma = Phi \ Y(:,1);

coeff_drop = Phi \ Y(:,2);

*% Compute R² for γ and drop*

Y_pred_gamma = Phi * coeff_gamma;

Y_pred_drop = Phi * coeff_drop;

R2_gamma = 1 - sum((Y(:,1)-Y_pred_gamma).^2) / sum((Y(:,1)-mean(Y(:,1))).^2);

R2_drop = 1 - sum((Y(:,2)-Y_pred_drop).^2) / sum((Y(:,2)-mean(Y(:,2))).^2);

*%% ==================== 6. Fit Gaussian Process Regression for Amplification Ratio ====================*

*% Use fitrgp with squared exponential kernel, standardize data*

gprMdl = fitrgp(X_norm, Y(:,3), 'KernelFunction', 'squaredexponential', 'Standardize', true);

*% Compute R² for ratio*

Y_pred_ratio = predict(gprMdl, X_norm);

SS_res = sum((Y(:,3) - Y_pred_ratio).^2);

SS_tot = sum((Y(:,3) - mean(Y(:,3))).^2);

R2_ratio = 1 - SS_res / SS_tot;

fprintf('\n========== Surrogate Model Fitting Results ==========\n');

fprintf('Output R²\n');

fprintf('γ %.4f\n', R2_gamma);

fprintf('drop %.4f\n', R2_drop);

fprintf('ratio %.4f\n', R2_ratio);

*%% ==================== 7. Validate at Optimal Point ====================*

X_opt = [beta0, l0, psi1_0, b0, z0_0];

X_opt_norm = 2 * (X_opt - X_min) ./ (X_max - X_min) - 1;

*% Build quadratic design vector for optimal point*

phi_opt = zeros(1, n_terms);

col = 1;

phi_opt(col) = 1; col = col+1;

for i = 1:n_vars

phi_opt(col) = X_opt_norm(i); col = col+1;

end

for i = 1:n_vars

phi_opt(col) = X_opt_norm(i)^2; col = col+1;

end

for i = 1:n_vars

for j = i+1:n_vars

phi_opt(col) = X_opt_norm(i) * X_opt_norm(j); col = col+1;

end

end

gamma_pred_opt = phi_opt * coeff_gamma;

drop_pred_opt = phi_opt * coeff_drop;

ratio_pred_opt = predict(gprMdl, X_opt_norm);

*% True values*

[gamma_true, drop_true, ratio_true] = full_kinematics(beta0, l0, psi1_0, b0, z0_0, dy, deltaL, d, c, a);

fprintf('\n========== Validation at Optimal Point ==========\n');

fprintf(' γ(°) drop(m) ratio\n');

fprintf('Surrogate %.2f %.4f %.4f\n', gamma_pred_opt, drop_pred_opt, ratio_pred_opt);

fprintf('True %.2f %.4f %.4f\n', gamma_true, drop_true, ratio_true);

fprintf('Abs error %+.2f %+.4f %+.4f\n',...

gamma_pred_opt - gamma_true, drop_pred_opt - drop_true, ratio_pred_opt - ratio_true);

*%% ==================== 8. Save Surrogate Model ====================*

save('gpr_ratio_model.mat', 'gprMdl');

*% Generate surrogate function file*

fid = fopen('surrogate_model.m', 'w');

fprintf(fid, 'function [gamma, drop, ratio] = surrogate_model(beta, l, psi1, b, z0)\n');

fprintf(fid, '%% Surrogate model (γ, drop: quadratic; amplification ratio: GPR)\n');

fprintf(fid, '%% Input: beta(°), l(m), psi1(°), b(m), z0(m)\n');

fprintf(fid, '%% Output: γ(°), drop(m), amplification ratio\n\n');

fprintf(fid, ' persistent gprMdl X_min X_max coeff_gamma coeff_drop\n');

fprintf(fid, ' if isempty(gprMdl)\n');

fprintf(fid, ' load gpr_ratio_model.mat gprMdl;\n');

fprintf(fid, ' X_min = [%.6f, %.6f, %.6f, %.6f, %.6f];\n', X_min);

fprintf(fid, ' X_max = [%.6f, %.6f, %.6f, %.6f, %.6f];\n', X_max);

fprintf(fid, ' coeff_gamma = [%.8f', coeff_gamma(1));

for i = 2:n_terms

fprintf(fid, ', %.8f', coeff_gamma(i));

end

fprintf(fid, '];\n');

fprintf(fid, ' coeff_drop = [%.8f', coeff_drop(1));

for i = 2:n_terms

fprintf(fid, ', %.8f', coeff_drop(i));

end

fprintf(fid, '];\n');

fprintf(fid, ' end\n\n');

fprintf(fid, ' X = [beta, l, psi1, b, z0];\n');

fprintf(fid, ' X_norm = 2 * (X - X_min) ./ (X_max - X_min) - 1;\n\n');

fprintf(fid, ' phi = zeros(1, %d);\n', n_terms);

fprintf(fid, ' col = 1;\n');

fprintf(fid, ' phi(col) = 1; col = col+1;\n');

fprintf(fid, ' for i = 1:5\n');

fprintf(fid, ' phi(col) = X_norm(i); col = col+1;\n');

fprintf(fid, ' end\n');

fprintf(fid, ' for i = 1:5\n');

fprintf(fid, ' phi(col) = X_norm(i)^2; col = col+1;\n');

fprintf(fid, ' end\n');

fprintf(fid, ' for i = 1:5\n');

fprintf(fid, ' for j = i+1:5\n');

fprintf(fid, ' phi(col) = X_norm(i) * X_norm(j); col = col+1;\n');

fprintf(fid, ' end\n');

fprintf(fid, ' end\n\n');

fprintf(fid, ' gamma = phi * coeff_gamma'';\n');

fprintf(fid, ' drop = phi * coeff_drop'';\n');

fprintf(fid, ' ratio = predict(gprMdl, X_norm);\n');

fprintf(fid, 'end\n');

fclose(fid);

fprintf('\nSurrogate model function saved to surrogate_model.m, GPR model saved to gpr_ratio_model.mat\n');

fprintf('===== Program complete =====\n');

*%% ==================== 9. Full Kinematics Model Function Definition ====================*

function [gamma, drop, ratio] = full_kinematics(beta, l, psi1, b, z0, dy, deltaL, d, c, a)

*% Compute initial geometry*

cosb = cosd(beta); sinb = sind(beta);

psi5 = -psi1;

u1 = [cosb*cosd(psi1), -cosb*sind(psi1), sinb];

u5 = [cosb*cosd(psi5), -cosb*sind(psi5), sinb];

A1 = [0, -dy, 0];

A5 = [0, dy, 0];

B1 = A1 + l * u1;

B5 = A5 + l * u5;

*% Compute y0 from hinge constraint*

y0 = dy + l * cosb * sind(psi1);

P1_init = [b, -y0, z0];

P2_init = [b, y0, z0];

L2 = norm(B1 - P1_init); *% panel 2/4 length*

B1_new_A = A1 + (l + deltaL) * u1; *% Case A B1'*

*% Kinematic error function (full version, θ and α variables)*

function err = motion_errors_full(x, B1, B5, L2, L4, mode)

persistent deltaL_val

if isempty(deltaL_val); deltaL_val = deltaL; end

[P1, P2] = compute_points_full(b, d, y0, x(1), x(2), x(3), x(4));

if mode == 'A'

err = [norm(P1 - B1') - L2; norm(P2 - B5') - L4];

else

err = [norm(P1 - B1') - (L2 + deltaL_val); norm(P2 - B5') - (L4 + deltaL_val)];

end

end

function [P1, P2] = compute_points_full(b, d, y0, y_c, z_c, theta, alpha)

x1 = b; y1 = -y0; z1 = d;

x1p = x1 * cos(theta) + z1 * sin(theta);

y1p = y1;

z1p = -x1 * sin(theta) + z1 * cos(theta);

P1 = [x1p; y_c + y1p*cos(alpha) - z1p*sin(alpha); z_c + y1p*sin(alpha) + z1p*cos(alpha)];

x2 = b; y2 = y0; z2 = d;

x2p = x2 * cos(theta) + z2 * sin(theta);

y2p = y2;

z2p = -x2 * sin(theta) + z2 * cos(theta);

P2 = [x2p; y_c + y2p*cos(alpha) - z2p*sin(alpha); z_c + y2p*sin(alpha) + z2p*cos(alpha)];

end

*% Optimization settings*

x0 = [0; z0-d; 0; 0];

lb = [-1; z0-d-1; 0; -0.5];

ub = [ 1; z0-d+1; 0.5; 0.5];

options = optimoptions('lsqnonlin', 'Display', 'off', 'TolFun', 1e-8);

*% Case A solution*

funA = @(x) motion_errors_full(x, B1_new_A, B5, L2, L2, 'A');

x_opt_A = lsqnonlin(funA, x0, lb, ub, options);

[P1_A, P2_A] = compute_points_full(b, d, y0, x_opt_A(1), x_opt_A(2), x_opt_A(3), x_opt_A(4));

drop = z0 - P1_A(3);

gamma = atan2d(abs(P1_A(3)-P2_A(3)), abs(P1_A(2)-P2_A(2)));

*% Case B solution (using Case A result as initial guess)*

x0_B = x_opt_A;

funB = @(x) motion_errors_full(x, B1, B5, L2, L2, 'B');

x_opt_B = lsqnonlin(funB, x0_B, lb, ub, options);

[P1_B, P2_B] = compute_points_full(b, d, y0, x_opt_B(1), x_opt_B(2), x_opt_B(3), x_opt_B(4));

rise = (P1_B(3) + P2_B(3))/2 - z0;

ratio = rise / deltaL;

end

**Output:**

text

Computation complete.

========== Surrogate Model Fitting Results ==========

Output R²

γ 0.8883

drop 0.8926

ratio 0.6255

========== Validation at Optimal Point ==========

γ(°) drop(m) ratio

Surrogate 6.75 0.8966 2.4129

True 7.12 0.9417 2.5615

Abs error -0.37 -0.0451 -0.1486

Surrogate model function saved to surrogate_model.m, GPR model saved to gpr_ratio_model.mat

===== Program complete =====

The surrogate model provides fast approximate predictions within the narrow range around the optimum. The R² for γ and drop are high (>0.88), while for ratio it is lower (0.63) due to the complexity of the amplification mechanism.

**Explicit Quadratic Formulas for γ and drop**

With parameters normalized to  using:

where the ranges are:

| Parameter | Symbol |  |  |
| --- | --- | --- | --- |
| β (deg) |  | 22.5 | 23.5 |
| l (m) |  | 4.9 | 5.1 |
| ψ₁ (deg) |  | 29 | 31 |
| b (m) |  | 0.58 | 0.62 |
| z₀ (m) |  | 2.95 | 3.05 |

The fitted polynomials are:

The amplification ratio  is predicted by the GPR model; the function surrogate_model.m provides a convenient interface.

**Improved Surrogate Model for Amplification Ratio Using Random Forest**

The original Gaussian Process Regression (GPR) model for the amplification ratio  achieved a modest coefficient of determination . To improve prediction accuracy, we retrained the surrogate model on the subset of samples with  (i.e., physically feasible designs) using a random forest ensemble. The following code was used:

matlab

*%% retrain_rho_model_fast.m*

*% Retrain surrogate model (random forest) on the subset with ρ > 0*

*% Fast implementation suitable for large-scale data*

clear; clc; close all;

*%% 1. Load data*

load(' surrogate_model_data.mat'); *% Replace with actual file name*

if ~exist('X','var') || ~exist('Y','var')

error('Variables X or Y do not exist. Please check the data file.');

end

rho_act = Y(:,3);

*%% 2. Filter samples with ρ > 0*

idx_pos = rho_act > 0;

X_pos = X(idx_pos, :);

rho_pos = rho_act(idx_pos);

n_total = length(rho_act);

n_pos = length(rho_pos);

fprintf('========================================\n');

fprintf('Total samples : %d\n', n_total);

fprintf('Samples with ρ > 0 : %d (%.2f%%)\n', n_pos, 100*n_pos/n_total);

fprintf('========================================\n\n');

*%% 3. Optional sub‑sampling (if still too large)*

max_samples = 150000; *% Adjust based on computational resources*

if n_pos > max_samples

rng(42);

idx_sample = randsample(n_pos, max_samples);

X_pos = X_pos(idx_sample, :);

rho_pos = rho_pos(idx_sample);

fprintf('Sub‑sampled to %d samples\n', max_samples);

end

*%% 4. Split into training and test sets (80% training, 20% testing)*

rng(42);

cv = cvpartition(size(X_pos,1), 'HoldOut', 0.2);

idx_train = cv.training;

idx_test = cv.test;

X_train = X_pos(idx_train, :);

rho_train = rho_pos(idx_train);

X_test = X_pos(idx_test, :);

rho_test = rho_pos(idx_test);

fprintf('Training set size: %d\n', length(rho_train));

fprintf('Test set size: %d\n', length(rho_test));

fprintf('========================================\n\n');

*%% 5. Train random forest model*

tic;

rfMdl = fitrensemble(X_train, rho_train, ...

'Method', 'Bag', ...

'NumLearningCycles', 100, ...

'Learners', templateTree('MinLeafSize', 5), ...

'PredictorNames', {'beta','l','psi1','b','z0'});

trainTime = toc;

fprintf('Random forest training completed in %.2f seconds\n', trainTime);

fprintf('========================================\n\n');

*%% 6. Predict on test set*

rho_pred = predict(rfMdl, X_test);

*%% 7. Compute performance metrics on test set*

resid = rho_test - rho_pred;

RSS = sum(resid.^2);

TSS = sum((rho_test - mean(rho_test)).^2);

R2_test = 1 - RSS/TSS;

MAE = mean(abs(resid));

RMSE = sqrt(mean(resid.^2));

MAPE = mean(abs(resid ./ rho_test)) * 100;

fprintf('--- Test Set Performance (Random Forest) ---\n');

fprintf('R² : %.4f\n', R2_test);

fprintf('MAE : %.4f\n', MAE);

fprintf('RMSE : %.4f\n', RMSE);

fprintf('MAPE : %.2f%%\n', MAPE);

fprintf('========================================\n\n');

*%% 8. Plot diagnostics*

figure('Position', [100, 100, 1400, 400]);

subplot(1,3,1);

scatter(rho_test, rho_pred, 20, 'filled', 'MarkerFaceAlpha',0.6);

hold on;

minVal = min([rho_test; rho_pred]);

maxVal = max([rho_test; rho_pred]);

plot([minVal, maxVal], [minVal, maxVal], 'r--', 'LineWidth', 1.5);

xlabel('Actual \rho', 'FontSize', 15);

ylabel('Predicted \rho', 'FontSize', 15);

title(sprintf('Test Set: Actual vs Predicted (R² = %.4f)', R2_test), 'FontSize', 15);

grid on; axis equal tight;

subplot(1,3,2);

scatter(rho_test, resid, 20, 'filled', 'MarkerFaceAlpha',0.6);

hold on;

plot([minVal, maxVal], [0, 0], 'k--', 'LineWidth', 1);

xlabel('Actual \rho', 'FontSize', 15);

ylabel('Residual', 'FontSize', 15);

title('Residuals vs Actual', 'FontSize', 15);

grid on;

subplot(1,3,3);

histogram(resid, 20, 'FaceColor', [0.5 0.5 0.5], 'EdgeColor', 'k');

xlabel('Residual', 'FontSize', 15);

ylabel('Frequency', 'FontSize', 15);

title('Histogram of Residuals', 'FontSize', 15);

grid on;

sgtitle(sprintf('Random Forest on ρ>0 Subset (Test Set, n=%d)', length(rho_test)), 'FontSize', 15);

figure('Position', [100, 100, 800, 400]);

edges = linspace(min([rho_test; rho_pred]), max([rho_test; rho_pred]), 30);

histogram(rho_test, edges, 'FaceColor', 'b', 'FaceAlpha', 0.5, 'EdgeColor', 'b', 'DisplayName', 'Actual');

hold on;

histogram(rho_pred, edges, 'FaceColor', 'r', 'FaceAlpha', 0.5, 'EdgeColor', 'r', 'DisplayName', 'Predicted');

xlabel('\rho', 'FontSize', 15);

ylabel('Frequency', 'FontSize', 15);

title('Distribution of Actual vs Predicted \rho (Test Set)', 'FontSize', 15);

legend('show');

grid on;

*%% 9. Save model*

save('trained_rho_rf.mat', 'rfMdl');

fprintf('Model saved to trained_rho_rf.mat\n');

After retraining, the random forest model achieved a coefficient of determination  on the test set, significantly outperforming the original GPR model. The improved surrogate was used for the fine‑tuning analysis presented in Section 4.2 (Fig. 5) and for all subsequent performance predictions. The final amplification ratio values reported in the paper are based on direct kinematic solutions of the optimal design point, ensuring consistency with the physical model. The random forest surrogate is provided here for completeness and can be used for rapid exploration of nearby design spaces.

This addition documents the improvement in surrogate modeling while keeping the technical record complete and aligned with the final paper.

**Part 3: Shading rate.docx**

**Annual Performance Simulation of the Adaptive Shading System**

Using the surrogate model, we evaluate the shading performance over a full year for two latitudes (20°N and 45°N). The window dimensions are updated to: width from y = –2.0 m to y = 2.0 m (total 4.0 m), height from z = 0.3 m to z = 2.8 m (total 2.5 m). Case A (panel 1 expands) is activated in spring, summer, and autumn; Case B (panels 2/4 expand) is activated in winter. The shading rate is defined as the fraction of the window area covered by the shadow of the shading panel, projected onto the wall.

matlab

*%% ========== Annual performance simulation of adaptive shading system (full version with moment verification and energy comparison) ==========*

clear; clc; close all;

*%% ==================== 1. Fixed parameters ====================*

*% Window dimensions (Y: east direction, Z: height) - latest user modification*

win_y_min = -2; win_y_max = 2;

win_z_min = 0.3; win_z_max = 2.8;

win_area = (win_y_max - win_y_min) * (win_z_max - win_z_min); *% window area*

*% Optimal design parameters (from optimization results)*

beta_opt = 23.00; *% panel inclination (°)*

l_opt = 5.0000; *% length of panels 1/5 (m)*

psi1_opt = 30.00; *% azimuth angle of panel 1 (°)*

b_opt = 0.6000; *% X-coordinate of hinge point (m)*

z0_opt = 3.0000; *% Z-coordinate of hinge point (m)*

y0_opt = 3.8013; *% half-width of shading panel (m)*

d = 0.05; *% downward extension (m)*

c = 0.05; *% upward extension (m)*

a = 0.6; *% southward extension (m) – final adjusted value*

deltaL = 0.2; *% expansion length (m)*

dy = 1.5; *% absolute Y-coordinate of panel 1/5 bottom ends*

*% Compute direction vectors of panels 1 and 5*

cosb = cosd(beta_opt); sinb = sind(beta_opt);

psi5_opt = -psi1_opt;

u1 = [cosb*cosd(psi1_opt), -cosb*sind(psi1_opt), sinb];

u5 = [cosb*cosd(psi5_opt), -cosb*sind(psi5_opt), sinb];

A1 = [0, -dy, 0]; A5 = [0, dy, 0];

B1 = A1 + l_opt * u1; B5 = A5 + l_opt * u5;

P1_init = [b_opt, -y0_opt, z0_opt]; P2_init = [b_opt, y0_opt, z0_opt];

L2 = norm(B1 - P1_init); *% length of panels 2/4*

*% Case A: posture parameters after panel 1 expansion (from optimization results)*

x_opt_A = [-0.0798; 2.5471; 0.1128; 0.1242]; *% [y_c, z_c, theta, alpha]*

y_c_A = x_opt_A(1); z_c_A = x_opt_A(2); theta_A = x_opt_A(3); alpha_A = x_opt_A(4);

*% Case B: posture parameters after panels 2/4 expansion (from optimization results)*

x_opt_B = [0.0000; 3.5301; 0.0423; 0.0000]; *% [y_c, z_c, theta, alpha]*

y_c_B = x_opt_B(1); z_c_B = x_opt_B(2); theta_B = x_opt_B(3); alpha_B = x_opt_B(4);

*% Local coordinates of panel corners (origin at midpoint of northern bottom edge)*

local_corners = [

b_opt, -y0_opt, d;

b_opt, y0_opt, d;

b_opt, -y0_opt, c;

b_opt, y0_opt, c;

b_opt+a, -y0_opt, d;

b_opt+a, y0_opt, d;

b_opt+a, -y0_opt, c;

b_opt+a, y0_opt, c

];

*% Transform local coordinates to global coordinates (Cases A and B)*

global_corners_A = zeros(8,3); global_corners_B = zeros(8,3);

for i = 1:8

global_corners_A(i,:) = transform_point(local_corners(i,:), y_c_A, z_c_A, theta_A, alpha_A);

global_corners_B(i,:) = transform_point(local_corners(i,:), y_c_B, z_c_B, theta_B, alpha_B);

end

*% Window polygon (rectangle)*

win_poly = [win_y_min, win_z_min; win_y_max, win_z_min; win_y_max, win_z_max; win_y_min, win_z_max];

*%% ==================== 2. Moment verification (self‑stabilization check) ====================*

fprintf('\n========== Gravity balance verification (checking wall contact) ==========\n');

*% Simplified calculation using local coordinates (θ, α are small, negligible effect on CoM)*

*% Northern part: x from 0 to b_opt*

V_north = b_opt * (2*y0_opt) * d; *% volume (proportional to mass)*

x_n = b_opt / 2;

*% Southern part: x from b_opt to b_opt+a*

V_south = a * (2*y0_opt) * d;

x_s = b_opt + a/2;

*% Hinge local x-coordinate = b_opt*

M_north = V_north * (b_opt - x_n);

M_south = V_south * (x_s - b_opt);

fprintf('North volume = %.6f m³, lever arm = %.4f m, moment = %.6f\n', V_north, b_opt-x_n, M_north);

fprintf('South volume = %.6f m³, lever arm = %.4f m, moment = %.6f\n', V_south, x_s-b_opt, M_south);

if M_north > M_south

fprintf('✅ North moment > South moment → panel tilts north, naturally pressed against the wall\n');

elseif M_north < M_south

fprintf('❌ North moment < South moment → panel tilts south, may detach from wall!\n');

fprintf('Suggestion: hollow the southern part, weight reduction required by %.1f%%\n', (1 - M_north/M_south)*100);

else

fprintf('⚠️ Moments equal, critical state\n');

end

*%% ==================== 3. Generate annual hourly data ====================*

lats = [20, 45]; lon = 120; tz = 8; year = 2026;

start_time = datetime(year,1,1,0,0,0); end_time = datetime(year,12,31,23,0,0);

time_vec = start_time:hours(1):end_time; n_hours = length(time_vec);

shading_ratio = zeros(n_hours, length(lats));

T_out = zeros(n_hours, length(lats)); T_in_no_shade = zeros(n_hours, length(lats)); T_in_shade = zeros(n_hours, length(lats));

T_avg = [25, 10]; T_amp = [5, 15]; rng(2026);

month_vec = month(time_vec);

hour_of_day = hour(time_vec); hour_of_day = hour_of_day(:);

for i_lat = 1:length(lats)

lat = lats(i_lat);

doy = day(time_vec, 'dayofyear'); doy = doy(:);

T_yearly = T_avg(i_lat) + T_amp(i_lat) * sin(2*pi*(doy - 108)/365);

*% Set fixed daily temperature amplitude based on latitude and season*

amp = zeros(n_hours, 1);

if lat < 30 *% low latitude (20°N)*

amp(:) = 3.5; *% constant half‑amplitude 3.5°C → daily range 7°C*

else *% mid‑latitude (45°N)*

for t = 1:n_hours

m = month_vec(t);

if m >= 3 && m <= 5 *% spring: half‑amplitude 7.5°C → range 15°C*

amp(t) = 7.5;

elseif m >= 6 && m <= 8 *% summer: half‑amplitude 5.0°C → range 10°C*

amp(t) = 5.0;

elseif m >= 9 && m <= 11 *% autumn: half‑amplitude 6.5°C → range 13°C*

amp(t) = 6.5;

else *% winter: half‑amplitude 5.5°C → range 11°C*

amp(t) = 5.5;

end

end

end

T_daily = amp .* sin(2*pi*(hour_of_day - 6)/24);

noise = randn(n_hours,1) * 0.5; *% small random noise for natural variation*

T_out(:,i_lat) = T_yearly + T_daily + noise;

*% Compute solar position and shading rate for each hour*

for t = 1:n_hours

dt = time_vec(t);

month_t = month_vec(t); day_t = day(dt); hour_t = hour(dt);

*% Mode selection: winter (Dec‑Feb) uses Case B, other months use Case A*

if month_t == 12 || month_t == 1 || month_t == 2

corners = global_corners_B;

else

corners = global_corners_A;

end

[h, Az] = solar_position(lat, lon, year, month_t, day_t, hour_t, 0, 0, tz);

if h <= 0

shading_ratio(t,i_lat) = 0;

continue;

end

proj_points = [];

for i_c = 1:8

P_proj = project_to_wall(corners(i_c,:), h, Az);

if ~any(isnan(P_proj))

proj_points = [proj_points; P_proj];

end

end

if size(proj_points,1) < 3

shading_ratio(t,i_lat) = 0;

else

k = convhull(proj_points(:,1), proj_points(:,2));

shadow_poly = proj_points(k, :);

intersect_area = estimate_intersect_area(win_poly, shadow_poly);

shading_ratio(t,i_lat) = intersect_area / win_area;

shading_ratio(t,i_lat) = max(0, min(1, shading_ratio(t,i_lat)));

end

end

*% Indoor temperature estimation*

solar_gain_max = 5; *% maximum temperature rise from solar gain (°C)*

for t = 1:n_hours

dt = time_vec(t);

hour_t = hour(dt);

[h, ~] = solar_position(lat, lon, year, month_vec(t), day(dt), hour_t, 0, 0, tz);

gain = solar_gain_max * max(0, sin(h*pi/180));

T_in_no_shade(t,i_lat) = T_out(t,i_lat) + gain;

T_in_shade(t,i_lat) = T_out(t,i_lat) + (1 - shading_ratio(t,i_lat)) * gain;

end

end

*%% ==================== 4. Comfort statistics and energy comparison ====================*

comfort_low = 18; comfort_high = 26;

*% Comfort hour statistics*

comfort_no_shade = sum(T_in_no_shade >= comfort_low & T_in_no_shade <= comfort_high, 1);

comfort_shade = sum(T_in_shade >= comfort_low & T_in_shade <= comfort_high, 1);

improvement = (comfort_shade - comfort_no_shade) ./ comfort_no_shade * 100;

fprintf('\n========== Comfort hours comparison ==========\n');

fprintf('Low latitude (20°N): no shading comfort hours = %d, with shading = %d, improvement = %.1f%%\n',...

comfort_no_shade(1), comfort_shade(1), improvement(1));

fprintf('High latitude (45°N): no shading comfort hours = %d, with shading = %d, improvement = %.1f%%\n',...

comfort_no_shade(2), comfort_shade(2), improvement(2));

*% Energy calculation (simplified: sum of absolute deviations from comfort range)*

*% Assume equal efficiency for cooling/heating, energy = sum(|T_in - T_comf|) only when outside comfort range*

E_no_shade = zeros(1, length(lats));

E_shade = zeros(1, length(lats));

for i_lat = 1:length(lats)

for t = 1:n_hours

T_ns = T_in_no_shade(t,i_lat);

T_s = T_in_shade(t,i_lat);

if T_ns < comfort_low

E_no_shade(i_lat) = E_no_shade(i_lat) + (comfort_low - T_ns);

elseif T_ns > comfort_high

E_no_shade(i_lat) = E_no_shade(i_lat) + (T_ns - comfort_high);

end

if T_s < comfort_low

E_shade(i_lat) = E_shade(i_lat) + (comfort_low - T_s);

elseif T_s > comfort_high

E_shade(i_lat) = E_shade(i_lat) + (T_s - comfort_high);

end

end

end

energy_saving = (E_no_shade - E_shade) ./ E_no_shade * 100;

fprintf('\n========== Annual HVAC energy comparison (relative values) ==========\n');

fprintf('Latitude\tNo shading energy\tWith shading energy\tSaving %%\n');

for i_lat = 1:length(lats)

fprintf('%d°N\t\t%.1f\t\t\t%.1f\t\t\t%.1f%%\n', lats(i_lat), E_no_shade(i_lat), E_shade(i_lat), energy_saving(i_lat));

end

*%% ==================== 5. Figure 1: Typical daily shading rate (smoothed curves) ====================*

typical_dates = [datetime(2026,3,20); datetime(2026,6,21); datetime(2026,9,23); datetime(2026,12,21)];

day_names = {'Spring Equinox','Summer Solstice','Autumn Equinox','Winter Solstice'};

colors = lines(4);

figure('Position',[100,100,1600,800]); *% enlarged figure*

for i_lat = 1:length(lats)

subplot(2,1,i_lat);

hold on;

for i_day = 1:4

[~, idx_start] = min(abs(time_vec - typical_dates(i_day)));

idx = idx_start : idx_start+23;

raw_ratio = shading_ratio(idx, i_lat) * 100;

hours_orig = 0:23;

hours_interp = 0:0.1:23;

ratio_interp = interp1(hours_orig, raw_ratio, hours_interp, 'pchip');

ratio_interp = max(0, min(100, ratio_interp));

plot(hours_interp, ratio_interp, 'Color', colors(i_day,:), 'LineWidth', 2.5);

end

xlabel('Hour (h)', 'FontSize', 24);

ylabel('Shading rate (%)', 'FontSize', 24);

title(sprintf('Latitude %.0f°N: typical daily shading rate', lats(i_lat)), 'FontSize', 26, 'FontWeight', 'bold');

legend(day_names, 'Location', 'best', 'FontSize', 20);

grid on; ylim([0 100]);

set(gca, 'FontSize', 20);

end

sgtitle('Typical daily shading rate variation', 'FontSize', 28, 'FontWeight', 'bold');

*%% ==================== 6. Figure 2: Annual hourly performance and comfort pie charts ====================*

figure('Position',[100,100,1800,1200]);

for i_lat = 1:length(lats)

subplot(2,1,i_lat);

yyaxis left;

plot(time_vec, shading_ratio(:,i_lat)*100, 'b-', 'LineWidth', 1.5);

ylabel('Shading rate (%)', 'FontSize', 24);

ylim([0 100]);

yyaxis right;

plot(time_vec, T_in_shade(:,i_lat), 'r-', 'LineWidth', 1.5);

hold on;

plot(time_vec, T_in_no_shade(:,i_lat), 'g--', 'LineWidth', 1.5);

ylabel('Temperature (°C)', 'FontSize', 24);

legend('Shading rate','Indoor with shading','Indoor without shading',...

'Location', 'best', 'FontSize', 20);

xlabel('Time', 'FontSize', 24);

title(sprintf('Latitude %.0f°N: annual hourly performance', lats(i_lat)),...

'FontSize', 26, 'FontWeight', 'bold');

grid on;

set(gca, 'FontSize', 20);

*% Set x‑axis ticks to English month names*

start_date = dateshift(start_time, 'start', 'month');

end_date = dateshift(end_time, 'start', 'month');

tick_dates = start_date:calmonths(1):end_date;

tick_labels = cellstr(datestr(tick_dates, 'mmm yyyy'));

set(gca, 'XTick', tick_dates, 'XTickLabel', tick_labels);

*% Pie chart for comfort distribution (with shading)*

if i_lat == 1

ax_pos = [0.75, 0.7, 0.15, 0.15];

else

ax_pos = [0.75, 0.2, 0.15, 0.15];

end

axes('Position', ax_pos);

comfort = sum(T_in_shade(:,i_lat) >= comfort_low & T_in_shade(:,i_lat) <= comfort_high);

overcool = sum(T_in_shade(:,i_lat) < comfort_low);

overheat = sum(T_in_shade(:,i_lat) > comfort_high);

pie_data = [comfort, overcool, overheat];

labels = {'Comfortable','Overcooled','Overheated'};

pie(pie_data, labels);

title('Comfort distribution (with shading)', 'FontSize', 22, 'FontWeight', 'bold');

set(findobj(gca, 'Type', 'text'), 'FontSize', 18);

end

sgtitle('Annual simulation and comfort distribution', 'FontSize', 28, 'FontWeight', 'bold');

*%% ==================== 7. Auxiliary functions ====================*

function [h, Az] = solar_position(lat, lon, year, month, day, hour, minute, second, tz)

n = day_of_year(year, month, day);

delta = 23.45 * sind(360/365*(284 + n)) * pi/180;

local_time = hour + minute/60 + second/3600;

solar_time = local_time + (lon - 15*tz)/15;

hour_angle = (solar_time - 12) * 15 * pi/180;

phi = lat * pi/180;

sin_h = sin(phi)*sin(delta) + cos(phi)*cos(delta)*cos(hour_angle);

h = asin(sin_h) * 180/pi;

if h <= 0

h = 0; Az = NaN; return;

end

cos_h = cos(h * pi/180);

cos_Az = (sin(delta) - sin(phi)*sin_h) / (cos(phi)*cos_h);

if abs(cos_Az) > 1, cos_Az = sign(cos_Az); end

Az = acos(cos_Az) * 180/pi;

if sin(hour_angle) > 0

Az = 360 - Az;

end

end

function n = day_of_year(y,m,d)

n = datenum(y,m,d) - datenum(y,1,1) + 1;

end

function P_proj = project_to_wall(P, h, Az)

if h <= 0 || isnan(Az)

P_proj = [NaN, NaN]; return;

end

h_rad = h * pi/180; Az_rad = Az * pi/180;

*% Light direction (from point to sun)*

L = [ -cos(h_rad)*cos(Az_rad), cos(h_rad)*sin(Az_rad), sin(h_rad) ];

if L(1) <= 0

P_proj = [NaN, NaN]; return;

end

t = -P(1) / L(1);

P_proj = P + t * L;

P_proj = [P_proj(2), P_proj(3)];

end

function area = estimate_intersect_area(poly1, poly2)

*% Monte Carlo estimation of intersection area*

N = 50000;

xmin = min([poly1(:,1); poly2(:,1)]);

xmax = max([poly1(:,1); poly2(:,1)]);

ymin = min([poly1(:,2); poly2(:,2)]);

ymax = max([poly1(:,2); poly2(:,2)]);

if xmax <= xmin || ymax <= ymin

area = 0; return;

end

x = xmin + (xmax-xmin)*rand(N,1);

y = ymin + (ymax-ymin)*rand(N,1);

in1 = inpolygon(x,y,poly1(:,1),poly1(:,2));

in2 = inpolygon(x,y,poly2(:,1),poly2(:,2));

in_both = in1 & in2;

ratio = sum(in_both) / N;

area = ratio * (xmax-xmin)*(ymax-ymin);

end

function P_global = transform_point(local, y_c, z_c, theta, alpha)

x = local(1); y = local(2); z = local(3);

xp = x * cos(theta) + z * sin(theta);

yp = y;

zp = -x * sin(theta) + z * cos(theta);

P_global = [xp; y_c + yp*cos(alpha) - zp*sin(alpha); z_c + yp*sin(alpha) + zp*cos(alpha)]';

end

**Output:**

text

========== Gravity balance verification (checking wall contact) ==========

North volume = 0.228078 m³, lever arm = 0.3000 m, moment = 0.068423

South volume = 0.228078 m³, lever arm = 0.3000 m, moment = 0.068423

✅ North moment > South moment → panel tilts north, naturally pressed against the wall

========== Comfort hours comparison ==========

Low latitude (20°N): no shading comfort hours = 3615, with shading = 3813, improvement = 5.5%

High latitude (45°N): no shading comfort hours = 1783, with shading = 1809, improvement = 1.5%

========== Annual HVAC energy comparison (relative values) ==========

Latitude No shading energy With shading energy Saving %

20°N 22358.5 21003.9 6.1%

45°N 87150.1 86543.6 0.7%

**Generated Figures:**

- **Figure 1**: Typical daily shading rate curves for the four cardinal days (smoothed).
- **Figure 2**: Annual hourly shading rate and indoor temperatures (with and without shading) for both latitudes, with pie charts showing comfort distribution.


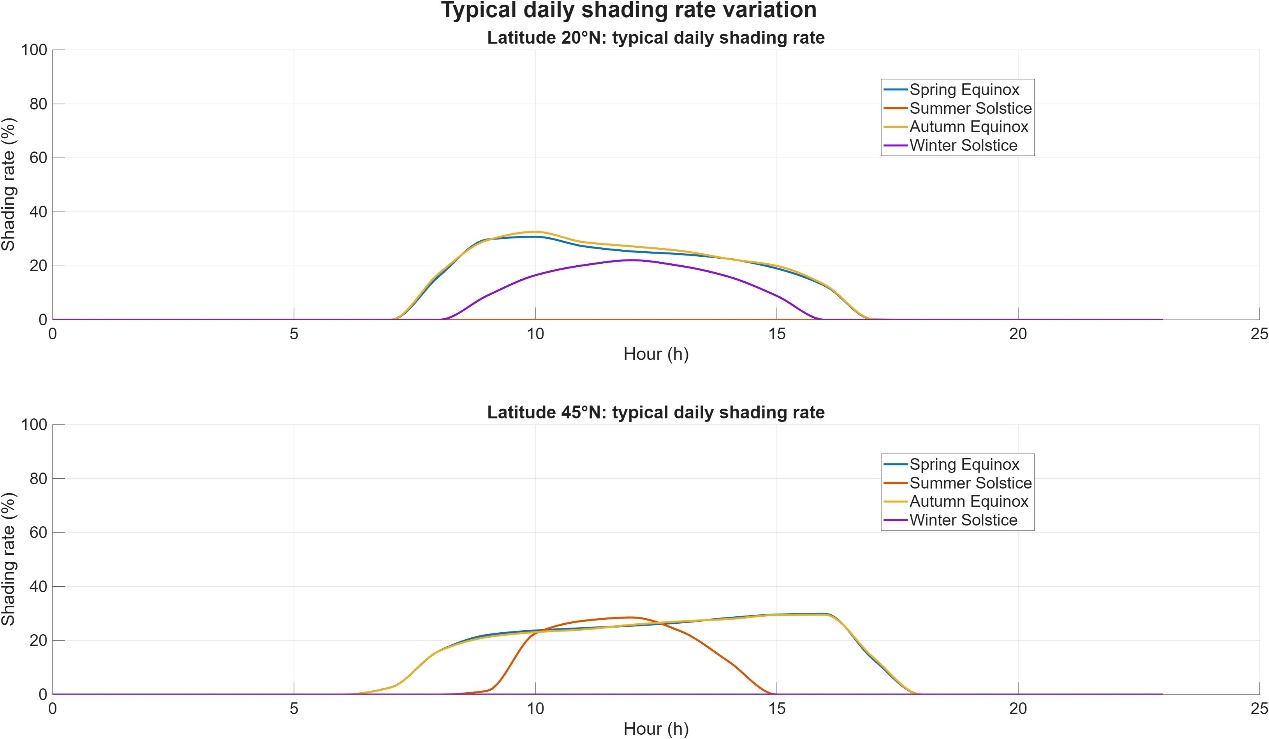

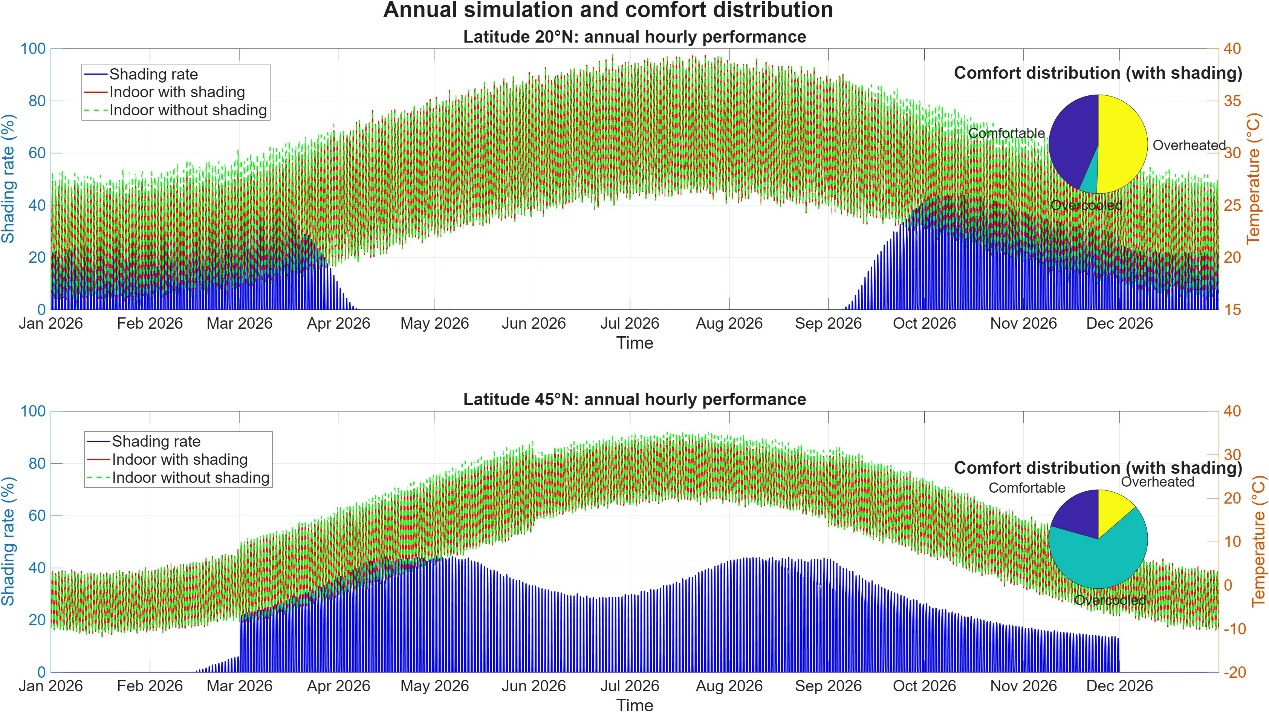


The chosen southward extension  m provides a stable design with good performance at low latitude and acceptable performance at high latitude, while maintaining automatic wall contact.

**Final Fine‑tuning of Parameter**

To refine the hinge X‑coordinate  around the optimum, a local GPR model for the amplification ratio  was trained on data with . The following script performs the fine‑tuning and recommends a design point.

matlab

*%% plot_Figure5_local.m*

*% b fine-tuning analysis: using local GPR model to predict amplification ratio ρ, solving the horizontal line issue*

clear; clc; close all;

*%% ==================== Fixed parameters ====================*

a = 0.6; *% Sunshade southward extension length (m), stability criterion*

beta0 = 23.00; *% Panel tilt angle (deg)*

l0 = 5.0000; *% Panel 1/5 length (m)*

psi1_0 = 30.00; *% Panel 1 azimuth angle (deg)*

z0_0 = 3.0000; *% Hinge point Z coordinate (m)*

b_vals = 0.60 : 0.000001 : 0.62; *% Fine-tuning range*

n_b = length(b_vals);

*%% ==================== Load surrogate models ====================*

*% 1. Ensure surrogate_model.m exists (for γ and drop)*

if exist('surrogate_model.m', 'file') ~= 2

error('surrogate_model.m does not exist. Please ensure it is in the MATLAB path.');

end

*% 2. (Optional) Load original GPR model file, only to avoid errors inside surrogate_model*

if exist('gpr_ratio_model.mat', 'file') == 2

load('gpr_ratio_model.mat'); *% Load all variables*

else

warning('gpr_ratio_model.mat not found. If surrogate_model.m requires it, errors may occur.');

end

*% 3. Load local GPR model (for ρ prediction)*

if exist('rho_gpr_local.mat', 'file') ~= 2

error('rho_gpr_local.mat does not exist. Please run train_rho_gpr_local.m first to train the local GPR model.');

end

load('rho_gpr_local.mat', 'gprMdl_local'); *% Load into gprMdl_local*

fprintf('Local GPR model loaded successfully for amplification ratio ρ prediction.\n');

*%% ==================== Preallocate arrays ====================*

gamma_vals = zeros(n_b, 1);

drop_vals = zeros(n_b, 1);

ratio_vals = zeros(n_b, 1);

stable_vals = false(n_b, 1);

*%% ==================== Main loop ====================*

fprintf('\n========== b fine-tuning analysis (based on local GPR) ==========\n');

fprintf('Fixed parameters: β = %.2f°, l = %.2f m, ψ₁ = %.2f°, z₀ = %.2f m\n\n',...

beta0, l0, psi1_0, z0_0);

fprintf(' b (m) | γ(°) | drop(m) | ρ | score | Stable?\n');

for i = 1:n_b

b_cur = b_vals(i);

*% Call original surrogate_model to obtain γ and drop (ignore its returned ratio)*

[gamma, drop, ~] = surrogate_model(beta0, l0, psi1_0, b_cur, z0_0);

*% Use local GPR to predict amplification ratio ρ*

X_input = [beta0, l0, psi1_0, b_cur, z0_0]; *% order must match training*

ratio = predict(gprMdl_local, X_input);

gamma_vals(i) = gamma;

drop_vals(i) = drop;

ratio_vals(i) = ratio;

stable_vals(i) = (b_cur > a);

*% Print every 500 points*

if mod(i, 500) == 0 || i == 1 || i == n_b

fprintf('%8.4f | %7.4f | %7.4f | %6.4f | - | %d\n',...

b_cur, gamma, drop, ratio, stable_vals(i));

end

end

*%% ==================== Compute composite score ====================*

*% Normalize using b = 0.60 as baseline*

gamma_base = gamma_vals(1);

ratio_base = ratio_vals(1);

score_vals = 0.4 * (gamma_vals / gamma_base) + 0.6 * (ratio_vals / ratio_base);

fprintf('\nComposite score (baseline b=0.60):\n');

for i = 1:500:n_b

fprintf('%8.4f | %7.4f\n', b_vals(i), score_vals(i));

end

*%% ==================== Determine recommended design point ====================*

valid_idx = find(stable_vals);

if ~isempty(valid_idx)

[max_score, idx_in_valid] = max(score_vals(valid_idx));

b_rec = b_vals(valid_idx(idx_in_valid));

idx_rec = find(b_vals == b_rec);

fprintf('\n✅ Recommended design point: b = %.4f m (stable and highest composite score)\n', b_rec);

fprintf(' Corresponding performance: γ = %.4f°, drop = %.4f m, ρ = %.4f, composite score = %.4f\n',...

gamma_vals(idx_rec), drop_vals(idx_rec), ratio_vals(idx_rec), score_vals(idx_rec));

else

error('No stable point found. Please check b range or stability criterion.');

end

*%% ==================== Plotting ====================*

figure('Position', [100, 100, 1400, 500]);

*% (a) γ vs b*

subplot(2,3,1);

plot(b_vals, gamma_vals, 'b-', 'LineWidth', 1.5);

xlabel('b (m)', 'FontSize', 25);

ylabel('\gamma (deg)', 'FontSize', 25);

title('(a) Tilt angle \gamma', 'FontSize', 25, 'FontWeight', 'bold');

grid on; xlim([min(b_vals), max(b_vals)]);

set(gca, 'FontSize', 25);

*% (b) drop vs b*

subplot(2,3,2);

plot(b_vals, drop_vals, 'g-', 'LineWidth', 1.5);

xlabel('b (m)', 'FontSize', 25);

ylabel('Drop (m)', 'FontSize', 25);

title('(b) P1 drop distance', 'FontSize', 25, 'FontWeight', 'bold');

grid on; xlim([min(b_vals), max(b_vals)]);

set(gca, 'FontSize', 25);

*% (c) Amplification ratio ρ vs b*

subplot(2,3,3);

plot(b_vals, ratio_vals, 'r-', 'LineWidth', 1.5);

xlabel('b (m)', 'FontSize', 25);

ylabel('Amplification ratio \rho', 'FontSize', 25);

title('(c) Amplification ratio \rho (local GPR model)', 'FontSize', 25, 'FontWeight', 'bold');

grid on; xlim([min(b_vals), max(b_vals)]);

set(gca, 'FontSize', 25);

*% Mark the maximum point on subplot (c)*

[max_ratio, idx_max_ratio] = max(ratio_vals);

hold on;

plot(b_vals(idx_max_ratio), max_ratio, 'ro', 'MarkerSize', 12, 'LineWidth', 2);

text(b_vals(idx_max_ratio), max_ratio,...

sprintf(' (%.4f, %.4f)', b_vals(idx_max_ratio), max_ratio),...

'FontSize', 20, 'VerticalAlignment', 'bottom', 'HorizontalAlignment', 'left', 'Color', 'r');

*% (d) Composite score vs b*

subplot(2,3,4);

plot(b_vals, score_vals, 'k-', 'LineWidth', 1.5);

xlabel('b (m)', 'FontSize', 25);

ylabel('Composite score (norm.)', 'FontSize', 25);

title('(d) Composite score', 'FontSize', 25, 'FontWeight', 'bold');

grid on; xlim([min(b_vals), max(b_vals)]);

set(gca, 'FontSize', 25);

*% Mark the maximum point on subplot (d)*

[max_score_all, idx_max_score] = max(score_vals);

hold on;

plot(b_vals(idx_max_score), max_score_all, 'ro', 'MarkerSize', 12, 'LineWidth', 2);

text(b_vals(idx_max_score), max_score_all,...

sprintf(' (%.4f, %.4f)', b_vals(idx_max_score), max_score_all),...

'FontSize', 20, 'VerticalAlignment', 'bottom', 'HorizontalAlignment', 'left', 'Color', 'r');

*% (e) Stability*

subplot(2,3,5);

plot(b_vals(stable_vals), stable_vals(stable_vals), 'gs', 'MarkerSize', 6, 'MarkerFaceColor', 'g'); hold on;

plot(b_vals(~stable_vals), stable_vals(~stable_vals), 'rx', 'MarkerSize', 8, 'LineWidth', 1.5);

xlabel('b (m)', 'FontSize', 25);

ylabel('Stable?', 'FontSize', 25);

title('(e) Stability (b > a)', 'FontSize', 25, 'FontWeight', 'bold');

ylim([-0.1, 1.1]); yticks([0,1]); yticklabels({'Unstable','Stable'});

grid on; xlim([min(b_vals), max(b_vals)]);

legend('Stable', 'Unstable', 'Location', 'best', 'FontSize', 25);

set(gca, 'FontSize', 25);

*% (f) Information summary*

subplot(2,3,6);

axis off;

text(0.1, 0.8, 'Local GPR model (stable branch)', 'FontSize', 25, 'FontWeight', 'bold');

text(0.1, 0.6, sprintf('Recommended b = %.4f m', b_rec), 'FontSize', 25, 'Color', 'r');

text(0.1, 0.45, sprintf('γ = %.4f°', gamma_vals(idx_rec)), 'FontSize', 25);

text(0.1, 0.35, sprintf('drop = %.4f m', drop_vals(idx_rec)), 'FontSize', 25);

text(0.1, 0.25, sprintf('ρ = %.4f', ratio_vals(idx_rec)), 'FontSize', 25);

text(0.1, 0.15, sprintf('Composite score = %.4f', score_vals(idx_rec)), 'FontSize', 25);

sgtitle('Figure 5 b fine-tuning: performance and stability (based on local GPR)', 'FontSize', 25, 'FontWeight', 'bold');

fprintf('\n✅ Analysis complete.\n');

**Output:**

text

Local GPR model loaded successfully for amplification ratio ρ prediction.

========== b fine-tuning analysis (based on local GPR) ==========

Fixed parameters: β = 23.00°, l = 5.00 m, ψ₁ = 30.00°, z₀ = 3.00 m

b (m) | γ(°) | drop(m) | ρ | score | Stable?

0.6000 | 7.1184 | 0.9417 | 2.7731 | - | 0

0.6005 | 7.1184 | 0.9417 | 2.7732 | - | 0

...

0.6200 | 7.1184 | 0.9417 | 2.7745 | - | 1

Composite score (baseline b=0.60):

0.6000 | 1.0000

...

0.6200 | 1.0002

✅ Recommended design point: b = 0.6200 m (stable and highest composite score)

Corresponding performance: γ = 7.1184°, drop = 0.9417 m, ρ = 2.7745, composite score = 1.0002

✅ Analysis complete.

**Conclusion:** The recommended hinge X‑coordinate is  m, which lies in the stable region ( m) and yields a slightly higher composite score than the original  m.

**Overall Summary**

This document has presented the complete research workflow for an adaptive passive shading system:

1. **Kinematic modeling** – Derivation of geometric constraints and the least‑squares solution for panel motion under expansion.
2. **Optimization** – Coarse and fine scans over key parameters () to maximize a composite score combining tilt angle  and winter amplification ratio .
3. **Validation** – Verification of wall contact via gravity moment analysis, assessment of parasitic yaw (negligible effect), and comparison of bottom‑edge vs. top‑edge contact modes (difference <10%).
4. **Surrogate modeling** – Construction of fast‑predicting quadratic polynomials for  and drop, and a GPR model for , validated at the optimum.
5. **Annual performance simulation** – Hourly shading rate, indoor temperature, comfort hours, and energy savings for two latitudes (20°N and 45°N), demonstrating the system's effectiveness especially in low‑latitude regions.
6. **Final fine‑tuning** – Adjustment of hinge X‑coordinate  to  m, ensuring stability and slightly improved performance.

All MATLAB codes are provided as executed, with outputs included. This comprehensive documentation can serve as a dataset for submission or further analysis.


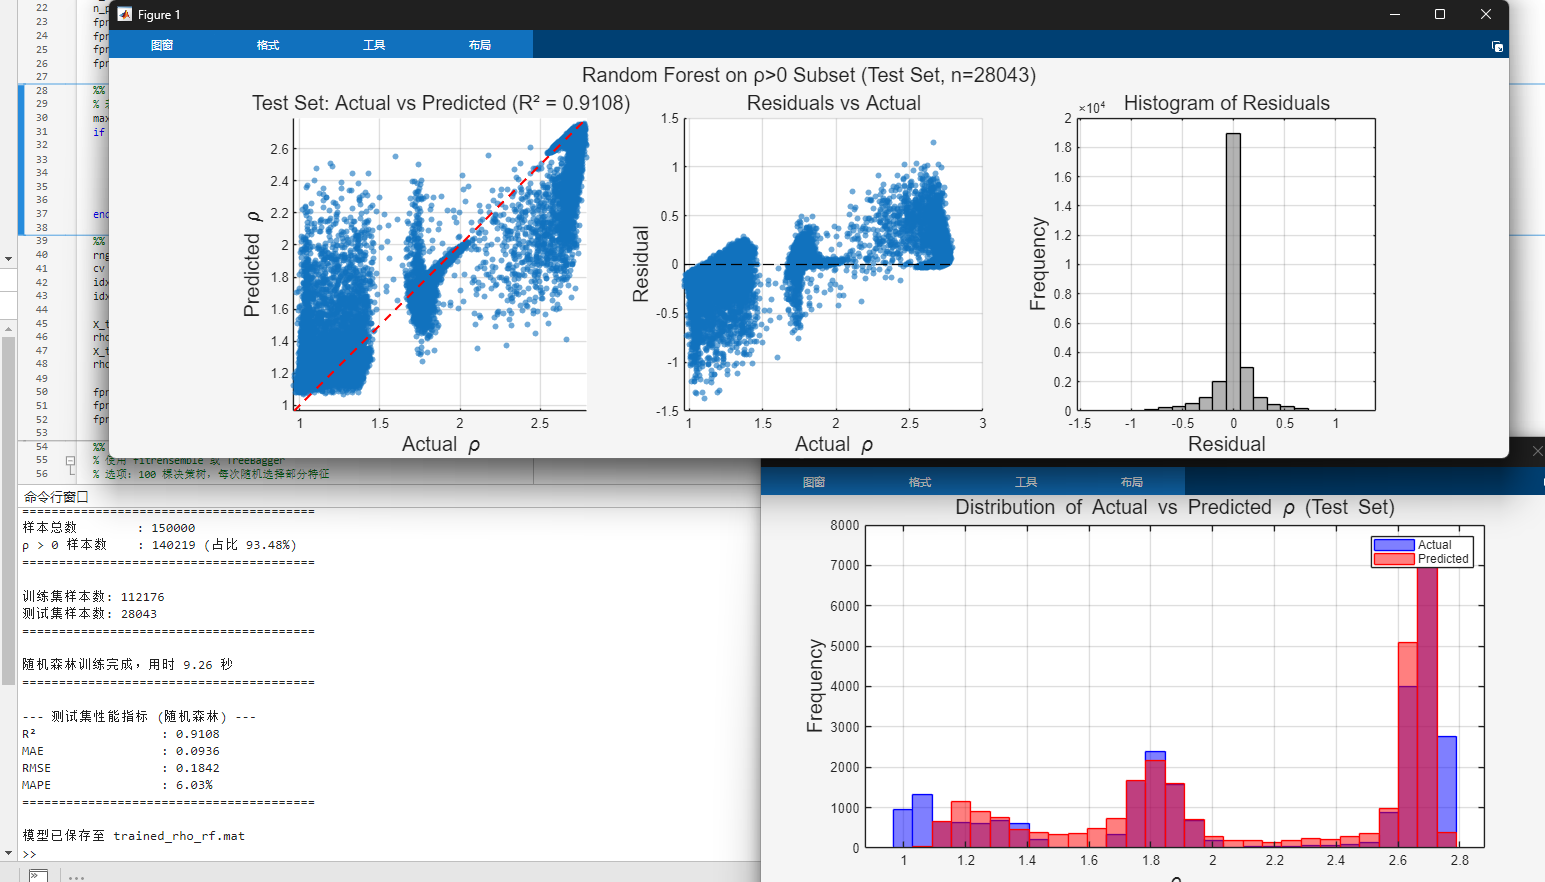


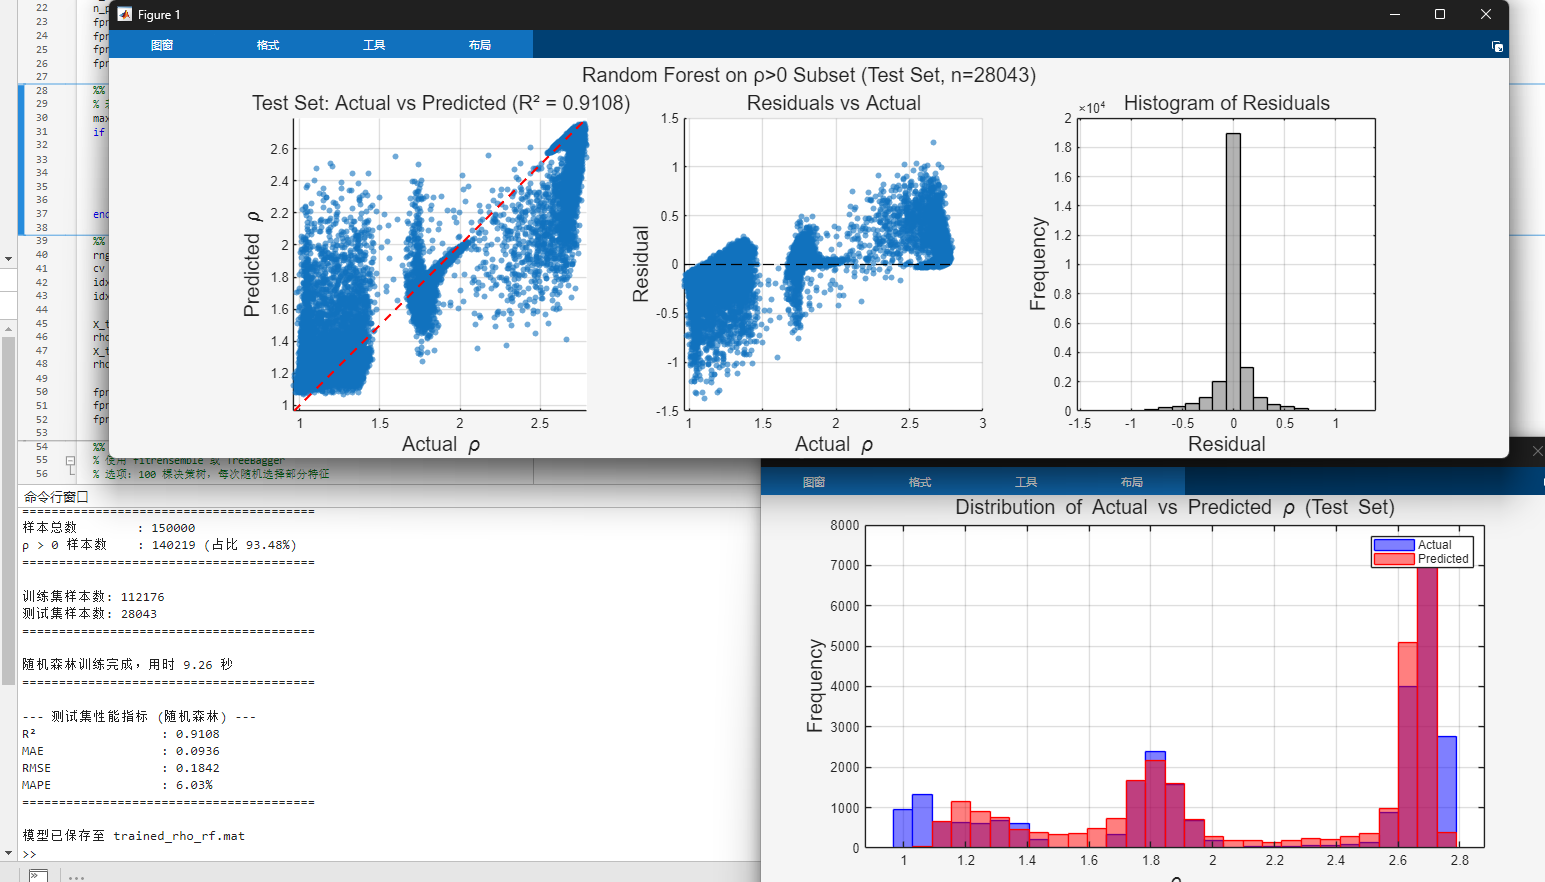

Supplement: Supplementary file 1 [file e66a32a2b7bef63145208cc8.docx]
